# Supplementary material
Source: Research Square preprint supplement (doi:10.21203/rs.3.rs-9891003/v1)
Supplement: Supplementary file 1 [file 6bf3fdebe0df8ed4e4e4556c.docx]

**Supplementary material**

**Effect and mechanism of 2-bromoethanesulfonic sodium, pH, and HRT on treating waste incineration leachate by hydrolysis acidification**

Yuchen Yuan 1, Xiaochen Xu 1[[1]](#footnote-0)*, Yanli Ma 2, Jiadong Liu 3, Fenglin Yang 1

1 Key Laboratory of Industrial Ecology and Environmental Engineering (MOE), Ministry of Education, School of Environmental Science and Technology, Dalian University of Technology, Dalian 116024, China.

2 Dalian Jingcheng Environmental Protection Industry Co., Ltd, Dalian 116024, China.

3 Key Laboratory of Northwest Water Resource, Environment and Ecology, MOE, Xi’an University of Architecture and Technology, Xi’an 710055, China.

**List of Supplementary material**

**Text S1** Testing method

**Text S2** EPS extraction

**Text S3** Protein and polysaccharide contents determination

**Text S4** Activity text of enzymes

**Text S5** Live/dead cells of sludge

**Text S6** Assays of electron transport system activity (ETSA)

**Text S7** Two-dimensional correlation spectroscopy (2D-COS) analysis

**Text S8** Metagenomics analysis

**Text S9** Metaproteomicanalysis

**Text S10** The influence of different HRTs on Dirammox treatment efficiency

**Table S1** The specific five regions of 3D fluorescence spectra.

**Table S2** The characteristic index of 3D fluorescence spectra.

**Table S3** Fluorescence regional integration (FRI) at different stages.

**Table S4** Wavelength data of 3D fluorescence in R0.

**Table S5** Wavelength data of 3D fluorescence in R1.

**Table S6** Wavelength data of 3D fluorescence in R2.

**Table S7** Average proportion of different components of VFAs in influent and effluent of R1 from stage Ⅵ to Ⅷ.

**Table S8** Relative content of protein secondary structure.

**Table S9** Organic matter diagram of influent in R1.

**Table S10** Organic matter of effluent in R1 at stage Ⅵ.

**Table S11** Organic matter of effluent in R1 at stage Ⅶ.

**Table S12** Organic matter of effluent in R1 at stage Ⅷ.

**Table S13** Summary table of chemical compounds.

**Table S14** Alpha diversity index results.

**Table S15** Protein expression of key enzymes.

**Table S16** Differential protein expression of key enzymes.

**Fig. S1.** 3D fluorescence analysis at different stages.

**Fig. S2.** GC-MS spectrum analysis (a: Influent; b: Effluent-stage Ⅵ; c: Effluent-stage Ⅶ; d: Effluent-stage Ⅷ).

**Fig. S3.** PCA analysis of different water qualities and compound types.

**Fig. S4.** Changes of NH4+-N concentration (a) and removal load of NH4+-N and COD (b) at influent and different HRTs.

**Fig. S5.** Changes of VFAs concentration (a) and VFAs proportion (b) at different HRTs.

**Text S1** Testing method

The effluents from the three reactors were filtered through a 0.45 μm fibre filter membrane and diluted according to concentration prior to daily measurement of COD, TOC, NH4+-N, pH, and VFAs. COD and NH4+-N were determined using standard methods. TOC, pH and VFAs were measured using an Elementar enviro TOC analyser (multi N/C 3100, Germany), a pH meter (PHS-25, INESA, China) and a gas chromatograph (GC-2010, Shimadzu, Japan) (Jin et al., 2018), respectively. On this basis, gas chromatography–mass spectrometry (GC‒MS) (7890A GC-5975C MS, Agilent, US) was also used to conduct qualitative or semiquantitative analyses of the functional groups, organic composition and structure of the effluent from the second part of the experiment.

After each stage, MLSSs and MLVSSs were measured using standard methods, EPS were extracted using the heat method, and protein (PN), polysaccharide (PS), and 3D fluorescence spectra were obtained using the Lowry method, the anthrone-sulfuric acid method and a fluorescence spectrum analyser (F-7100, Japan), respectively. In part one of the experiment, the activity of acetate kinase (ACK), coenzyme M (CoM) and coenzyme F420 (CoF420), was entered into Scientific Compass, and the live/dead cells in the sludge were observed using confocal laser scanning microscopy (CLSM) (Zeiss LSM 900, Germany). In part two of the experiment, a biological acute toxicity test was performed, and electron transport system activity (ETSA) and protein secondary structure were analysed using a microplate-type multifunctional detector (GloMax-Multi2011ZSIR0369, US) (UV‒Vis spectrophotometer (TU-1810, China)) and Fourier-transform infrared spectroscopy (FTIR) (Thermo Scientific Nicolet Summit X, US), respectively.

**Text S2** EPS extraction

EPS was extracted by heat treatment, and the specific steps were as follows. Firstly, 50 mL tubes containing 25 mL activated sludge were centrifuged at 7500 rpm for 5 min, the supernatant was discarded, and the centrifuged sludge was resuspend with 15 mL 0.9% NaCl solution. Then, the suspension was successively ultrasonicated for 2 min, oscillated for 10 min, ultrasonicated for 2 min, and centrifuged at 8500 rpm for 10 min to obtain the supernatant of loosely bound EPS (LB-EPS). Next, the centrifuged sludge was resuspended again in 25 mL 0.9% NaCl solution, ultrasonicated for 30 min, heated in a boiling water bath for 30 min, and centrifuged at 12000 rpm for 20 min after being cooled to room temperature, getting the supernatant of tightly bound EPS (TB-EPS).

**Text S3** Protein and polysaccharide contents determination

Protein content was determined using the Lowry method, and the specific process was as follows: 5 mL of basic copper solution was added to a 10 mL centrifuge tube containing 1 mL sample, standing at room temperature for 10 min. Subsequently, 0.5 mL 0.01mol/L Folinol reagent was added, shaken to mix well, and left to stand at room temperature for 30 min. Then, the absorbance at 650 nm was measured using a UV spectrophotometer. 1 mL deionized water was operated according to the above process as the blank control group, and the protein concentration was finally calculated through the standard curve.

Polysaccharide content was determined using the anthrone-sulfuric acid method, and the specific method was as follows: 4 mL anthranone reagent was added to a 10 mL colorimetric tube containing 1 mL sample, shaken to cool down, and heated in a boiling water bath for 10 min. Then, the absorbance at 620 nm was measured using a UV spectrophotometer. 1 mL deionized water was operated according to the above process as the blank control group, and the polysaccharide concentration was finally calculated through the standard curve.

**Text S4** Activity text of enzymes

The kit used the double antibody sandwich method to determine the level of acetate kinase (ACK), coenzyme M (CoM) and coenzyme F420 (CoF420) in the specimen. The testing process was consistent, and the specific steps were as follows: The microplate was coated with purified ACK/CoM/CoF420 antibody to form a solid-phase antibody. ACK/CoM/CoF420 was sequentially added to the microplate wells coated with the monoclonal antibody, followed by binding with HRP-labeled ACK/CoM/CoF420 antibody to form an antibody-antigen-enzyme-labeled antibody complex. After thorough washing, the substrate TMB was added for color development. TMB was converted to blue under HRP catalysis and further transformed into final yellow under acidic conditions. The intensity of the color was positively correlated with the ACK/CoM/CoF420 concentration in the sample. Absorbance (OD value) was measured using an enzyme immunoassay reader at 450 nm wavelength, and the activity concentration of ACK/CoM/CoF420 in the sample was calculated through a standard curve.

**Text S5** Live/dead cells of sludge

An appropriate amount of sample was taken into a 2 mL centrifuge tube, resuspend with water, and discarded the supernatant after centrifuging at 5000 rpm for 5 minutes.

5 μM Syto-9 and 2 μg/mL PI were used to prepare the staining working solution. 500 μL of the staining working solution was added to the sample and mixed well, then staining in the dark at 37 °C for 15 minutes.

After the staining was completed, the sample was centrifuged at 5000 rpm for 5 minutes and the staining solution was discarded. The staining solution was washed off with sterile physiological saline, 20 μL of the sample solution was taken, dropped onto a slide, covered with a coverslip, and placed on a laser confocal microscope (200 or 400 times) for shooting.

**Text S6** Assays of electron transport system activity (ETSA)

The sample was washed twice with PBS buffer and centrifuged at 4000 rpm for 10 minutes. 1 mL of 0.2% 2- (4-iodophenyl) -3- (4-nitrophenyl) -5-phenyltetrazolium chloride (INT) solution was added to 2 mL of sample. The mixture was incubated in the dark at 35 °C on a constant temperature shaker at 150 rpm for 30 minutes. 1 mL of 37% methanol was added to terminate the enzymatic reaction, and then centrifuged at 4000 rpm for 5 minutes to discard the supernatant. Formaldehyde (INF) was extracted by shaking 5 mL of methanol at 150 rpm for 5 minutes in the dark at 35 °C. After centrifuging at 4000 rpm for 5 minutes to collect the supernatant, the absorbance of the extract was immediately read at 485 nm using a UV spectrophotometer (TU-1810, China). The excess sludge was recorded after drying to a fixed weight at 105 °C. This testing method was based on previous research [1] and had been adjusted on this basis. The ETSA value was calculated as follows:

Where D485 was the absorbance value; V (mL) was the volume of the extractant; W (mg) was the dry weight of the sludge, and T (h) was the incubation time after adding INT.

**Text S7** Two-dimensional correlation spectroscopy (2D-COS) analysis

Effluent samples from different HRTs were centrifuged at 8500 rpm for 5 minutes, and the supernatants were taken for freeze-drying. The freeze-dried samples were determined by Fourier transform infrared (FTIR) spectroscopy (Thermo Scientific Nicolet Summit X, US), and the functional groups involved in the spectrum were analyzed using the Omnic software. On this basis, the Peakfit software was used to calculate the second derivative spectrum and the fitting curve to detect the secondary structure of proteins. Meanwhile, 2D-COS map analysis was conducted using 2DShige software, with HRT as the disturbance variable. Based on FTIR data, the influence of HRT on the structural changes of effluent substances was explored.

**Text S8** Metagenomics analysis

8.1 DNA extraction

0.2g of sludge was used to extract total genomic DNA with the E.Z.N.A.® Soil DNA Kit (Omega Bio-Tek, Norcross, GA, U.S.) according to manufacturer’s instructions. Concentration and purity of extracted DNA was determined with SynergyHTX and NanoDrop2000, respectively. DNA quality was checked on 1% agarose gel.

8.2 Metagenomic sequencing

DNA extract was fragmented to an average size of about 350 bp using Covaris M220 (Gene Company Limited, China) for paired-end library construction. Paired-end library was constructed using NEXTFLEX Rapid DNA-Seq (Bioo Scientific, Austin, TX, USA). Paired-end sequencing was performed on Illumina NovaSeq™ X Plus (Illumina Inc., San Diego, CA, USA) at Majorbio Bio-Pharm Technology Co., Ltd. (Shanghai, China) using NovaSeq X Kits/HiSeq Reagent Kit according to the manufacturer’s instructions (www.illumina.com).

8.3 Processing of metagenome sequencing data

The data were analyzed on the free online platform of Majorbio Cloud Platform (www.majorbio.com). Briefly, the raw sequencing reads were trimmed of adapters, and low-quality reads (length<50 bp or with average quality value <20) were removed by fastp(https://github.com/OpenGene/fastp, version 0.20.0).

The quality-filtered data were assembled using MEGAHIT([https://github.com/voutcn/megahit](https://github.com/voutcn/megahit" \t "https://academic.oup.com/bioinformatics/article/31/10/1674/), version 1.1.2). Contigs with a length ≥ 300 bp were selected as the final assembling result. Open reading frames (ORFs) from each assembled contigs were predicted using Prodigal（https://github.com/hyattpd/Prodigal，version2.6.3）and a length ≥ 100 bp ORFs were retrieved.

A non-redundant gene catalog was constructed using CD-HIT (http://weizhongli-lab.org/cd-hit/, version 4.7) with 90% sequence identity and 90% coverage. Gene abundance for a certain sample was eatimated by SOAPalignerb (https://github.com/ShujiaHuang/SOAPaligner，version soap2.21release) with 95% identity.

8.4 Taxonomic and functional annotation

The best-hit taxonomy of non-redundant genes was obtained by aligning them against the NCBI NR database by DIAMOND(http://ab.inf.uni-tuebingen.de/software/diamond/, version 2.0.13) with an e-value cutoff of 1e-5. Similarly, the functional annotation (GO, KEGG, eggNOG, CAZy, CARD, PHI) of non-redundant genes was obtained. Based on the taxonomic and functional annotation and the abundance profile of non-redundant genes, the differential analysis was carried out at each taxonomic, functional, or gene-wise level by Kruskal-Wallis test.

**Text S9** Metaproteomicanalysis

9.1 Total protein extraction

Take out the samples in the frozen state and put it on ice. The samples were suspended in BPP buffer and the mixture were treated by high-flux tissue grinding machine for 3 times, 40 s each. Centrifuged at 4℃ 12000g for 20min, collected supernatant, added Tris-saturated phenol in equal volume, and vortex mixed for 10min at 4℃. The phenol phase was collected after centrifuged at 4℃ 12000g for 20min, then added to the BPP solution in equal volume and vortex mixed at 4℃ for 10min. Centrifuged at 4℃ 12000g for 20min to collect the phenol phase, added 5 times the volume of pre-cooled ammonium acetate methanol solution, and placed overnight at -20℃ to precipitate the protein. Next day, centrifuged at 4℃ 12000g for 20min to discard the supernatant, added 90% pre-cooled acetone to the precipitation, mixed well, centrifuged and discarded the supernatant, repeat twice. The precipitation was dissolved with protein lysate (8M urea +1%SDS, including protease inhibitor cocktail), ultrasound on ice for 2min, after centrifugation at 12000g at 4°C for 20min, the concentration of protein from the supernatant collected was determined by Bicinchoninic acid (BCA) method by BCA Protein Assay Kit（Thermo Scientific). Protein quantification was performed according to the kit protocol. After protein quantification, SDS-PAGE electrophoresis was performed.

9.2 Protein digestion

100 μg protein re-suspended with Triethylammonium bicarbonate buffer (TEAB) which with the final concentration of 100 mM. The mixture was reduced with Tris (2-carboxyethyl) phosphine (TCEP) which with the final concentration of 10 mM at 37 °C for 60 min and alkylated with iodoacetamide (IAM) which with the final concentration of 40 mM at room temperature for 40min in darkness. After centrifugation at 10000g at 4°C for 20min, the pellet was collected, which re-suspended with 100 μL Triethylammonium bicarbonate buffer (TEAB) which with the final concentration of 100 mM. Trypsin was added at 1:50 trypsin to-protein mass ratio and incubated at 37 °C overnight.

9.3 Peptide desalting and quantification

After trypsin digestion, the peptides were dried by vacuum pump. Then, the enzymatically drained peptides were re-solubilized with 0.1% trifluoroacetic acid (TFA), and the peptides were desalted with HLB and dried by vacuum concentrator. Finally, the peptides were quantified using the NANO DROP ONE(Thermo Scientific) by UV absorption value .

9.4 DIA mass detection

Based on peptide quantification results, the peptides were analyzed by an VanquishNeo coupled with an Orbitrap Astral mass spectrometer (Thermo, USA) at Majorbio Bio-Pharm Technology Co. Ltd. (Shanghai, China). Briefly, the uPAC High Throughptu column (75 μm×5.5 cm, Thermo, USA) was used with solvent A (water with 2% ACN and 0.1% formic acid) and solvent B ( water with 80% ACN and 0.1% formic acid). The chromatography run time was set to 8 minutes. Data-independent acquisition (DIA) data were acquired using an Orbitrap Astral mass spectrometer operated in DIA mode. The detection was carried out over a mass range of 70-1050 m/z (MS1), and 150-2000 m/z (MS2).

9.5 Protein identification

The DIA mass spectrometric raw data were searched and processed with the Spectronaut software (Version 19) software against the non-redundant metagenomic-constructed database. The parameters are as follows up : The peptide length range was set to 7-52, Enzyme cutting site was trypsin/P, The maximum missed cleavage site was 2, Carbamidomethylation of cysteines as fixed modification, and oxidation of methionines and protein N-terminal acetylation as variable modifications；Protein FDR ≤ 0.01，Peptide FDR ≤ 0.01，Peptide Confidence ≥ 99%，XIC width ≤ 75ppm. The protein quantification method was MaxLFQ.

9.6 Statistical analyses

P-values and Fold change (FC) for the proteins between the two groups were calculated using R package “t-test”. The thresholds of fold change (>1.2 or <0.83) and P-value <0.05 were used to identify differentially expressed proteins (DEPs). Functional annotation of all identified proteins was performed using GO (http://geneontology.org/) and KEGG pathway (http://www.genome.jp/kegg/). DEPs were further used to for GO and KEGG enrichment analysis. Protein-protein interaction analysis was performed using the String v11.5.

**Text S10** The influence of different HRTs on Dirammox treatment efficiency

To verify that the degree of HA was the highest when the HRT was 16 h and that organic matter was more easily utilized, we assessed the influent and the effluent under different HRTs using Dirammox. The NH4+-N concentration tended to decrease, but the removal load varied markedly (Fig. S4). Removal efficiency was clearly highest when the influent was treated by HA after 16 h, and the removal loads for COD and NH4+-N were 74.53 and 875.63 mg/L·d, respectively.

**Table S1** The specific five regions of 3D fluorescence spectra.

| Region | EX (nm) | EM (nm) |
| --- | --- | --- |
| Region I (Aromatic Protein I) | 200-250 | 280-330 |
| Region Ⅱ (Aromatic Protein Ⅱ) | 200-250 | 330-380 |
| Region Ⅲ (Fulvic acid-like) | 200-250 | 380-550 |
| Region Ⅳ (Soluble microbial by-product-like) | 250-350 | 280-380 |
| Region V (Humic acid-like) | 250-400 | 380-550 |

**Table S2** The characteristic index of 3D fluorescence spectra.

| Index | Meaning | Formula |
| --- | --- | --- |
| FI | Reflecting the relative contribution of aromatic and non-aromatic amino acids to the fluorescence intensity of DOM (FI<1.4: terrestrially; FI> 1.9: microbially) | FI = I (Ex370:Em470) / I (Ex370: Em520) |
| HIX | Representing the humification degree of the DOM (HIX < 4: weak humification; HIX>10: strong humification. The larger HIX, the higher degree of DOM humification and the better stability) | HIX=∑(I435-I480)/ ∑(I300-I345) |
| BIX | Estimating the relative contribution of autochthonous substances to DOM (BIX< 0.6: less autochthonous DOM; BIX >1: more autochthonous DOM) | BIX=I (Ex310:Em380)/ I (Ex310: Em430) |
| Fn(280) | Indicating the relative concentration of protein-like substances | Fn(280)= Imax (Ex280:Em340-360) |
| Fn(355) | Indicating the relative concentration of humic-like substances | Fn(355)= Imax (Ex355:Em440-470) |

**Table S3** Fluorescence regional integration (FRI) at different stages.

| Stage | Reactor | Region I | Region Ⅱ | Region Ⅲ | Region Ⅳ | Region Ⅴ |
| --- | --- | --- | --- | --- | --- | --- |
| Ⅰ | R0 | 277.74 | 474.97 | 390.58 | 13781.16 | 9987.59 |
| R1 | 721.30 | 931.24 | 733.79 | 16915.54 | 10982.94 |
| R2 | 667.58 | 839.29 | 705.27 | 17306.54 | 10666.05 |
| Ⅱ | R0 | 319.39 | 167.18 | 0.00 | 8657.50 | 6176.68 |
| R1 | 753.18 | 475.82 | 60.08 | 13671.53 | 7446.12 |
| R2 | 598.31 | 315.33 | 0.00 | 8009.32 | 6275.61 |
| Ⅲ | R0 | 662.79 | 684.14 | 391.25 | 10453.71 | 7844.07 |
| R1 | 679.50 | 524.77 | 173.22 | 5196.77 | 6143.21 |
| R2 | 775.73 | 577.93 | 140.43 | 5373.43 | 5774.61 |
| Ⅳ | R0 | 858.93 | 852.40 | 600.56 | 8855.95 | 7242.49 |
| R1 | 601.33 | 488.63 | 67.42 | 2756.40 | 4312.74 |
| R2 | 709.48 | 489.67 | 65.43 | 4497.51 | 4869.51 |
| Ⅴ | R0 | 1716.53 | 1208.64 | 1378.22 | 14151.63 | 7952.84 |
| R1 | 1031.35 | 744.44 | 523.57 | 11355.01 | 7148.93 |
| R2 | 906.38 | 538.06 | 364.82 | 11569.60 | 6773.02 |

**Table S4** Wavelength data of 3D fluorescence in R0.

| EX/EM(nm) | Stage Ⅰ | Stage Ⅱ | Stage Ⅲ | Stage Ⅳ | Stage Ⅴ |
| --- | --- | --- | --- | --- | --- |
| 220.0/320.0 | 5.0183 | 12.982 | 11.913 | 15.952 | 58.036 |
| 230.0/330.0 | 4.8845 | -2.0815 | 6.7314 | 7.3878 | 9.6782 |
| 240.0/340.0 | 15.823 | 7.4298 | 16.692 | 14.417 | 40.541 |
| 250.0/350.0 | 58.17 | 24.189 | 34.795 | 49.185 | 63.257 |
| 260.0/360.0 | 140.93 | 75.267 | 91.889 | 85.126 | 112.71 |
| 270.0/370.0 | 221.47 | 116.49 | 125.25 | 143.14 | 188.12 |
| 280.0/380.0 | 275.53 | 151.16 | 164.21 | 176.57 | 199.4 |
| 290.0/390.0 | 285.85 | 150.96 | 195.92 | 182.43 | 217.11 |
| 300.0/400.0 | 301.63 | 170.22 | 227.98 | 207.34 | 212.71 |
| 310.0/410.0 | 285.63 | 152.6 | 210.97 | 212.74 | 203.37 |
| 320.0/420.0 | 270.04 | 147.91 | 195.37 | 185.18 | 186.54 |
| 330.0/430.0 | 241.42 | 136.95 | 168.04 | 161.23 | 164.29 |
| 340.0/440.0 | 222.09 | 122.88 | 158.35 | 147.27 | 155.33 |
| 350.0/450.0 | 197.59 | 112.58 | 146.55 | 131.32 | 137.2 |
| 360.0/460.0 | 172.1 | 97.486 | 128.69 | 119.05 | 118.57 |
| 370.0/470.0 | 135.51 | 78.099 | 111.68 | 99.466 | 100.14 |
| 380.0/480.0 | 103.55 | 58.329 | 89.947 | 81.269 | 75.351 |
| 390.0/490.0 | 79.157 | 45.283 | 72.767 | 68.174 | 58.952 |
| 400.0/500.0 | 56.274 | 34.448 | 55.164 | 50.991 | 44.259 |
| 410.0/510.0 | 39.218 | 24.15 | 39.849 | 36.024 | 30.356 |
| 420.0/520.0 | 25.078 | 15.789 | 25.114 | 23.062 | 19.611 |
| 430.0/530.0 | 16.916 | 9.5431 | 15.181 | 13.736 | 11.706 |
| 440.0/540.0 | 10.339 | 5.8565 | 9.2139 | 8.1087 | 7.0938 |
| 450.0/550.0 | 6.4842 | 3.3642 | 5.4069 | 4.3618 | 4.3177 |
| 460.0/560.0 | 4.63 | 2.2097 | 3.4296 | 2.8956 | 2.5422 |
| 470.0/570.0 | 3.0572 | 1.366 | 2.4374 | 2.0051 | 1.8249 |
| 480.0/580.0 | 1.9219 | 0.8431 | 1.5752 | 1.2803 | 1.0272 |
| 490.0/590.0 | 1.3152 | 0.5374 | 1.0657 | 1.0113 | 0.8251 |
| 500.0/600.0 | 1.0599 | 0.3758 | 0.8771 | 0.8616 | 0.8026 |
| 510.0/610.0 | 0 | 0 | 0 | 0 | 0 |

**Table S5** Wavelength data of 3D fluorescence in R1.

| EX/EM(nm) | Stage Ⅰ | Stage Ⅱ | Stage Ⅲ | Stage Ⅳ | Stage Ⅴ |
| --- | --- | --- | --- | --- | --- |
| 220.0/320.0 | 10.52 | 14.31 | 11.373 | 10.556 | 13.957 |
| 230.0/330.0 | 7.5627 | 6.7221 | 8.0388 | 2.8515 | 8.3001 |
| 240.0/340.0 | 26.711 | 11.108 | 11.05 | 15.315 | 19.39 |
| 250.0/350.0 | 67.349 | 30.51 | 22.357 | 20.082 | 32.797 |
| 260.0/360.0 | 152.32 | 77.934 | 58.593 | 51.839 | 84.144 |
| 270.0/370.0 | 239.95 | 127.16 | 97.607 | 77.905 | 142.1 |
| 280.0/380.0 | 308.04 | 147.78 | 127.72 | 103.64 | 155.82 |
| 290.0/390.0 | 287.9 | 154.2 | 154.32 | 118.55 | 183.59 |
| 300.0/400.0 | 311.23 | 170.52 | 172.39 | 124.37 | 192.53 |
| 310.0/410.0 | 314.34 | 166.21 | 168.87 | 133.14 | 189.88 |
| 320.0/420.0 | 286.89 | 163.34 | 164.27 | 119.17 | 178.77 |
| 330.0/430.0 | 265.19 | 149.89 | 148.5 | 112.15 | 160.86 |
| 340.0/440.0 | 241.49 | 136.49 | 135.02 | 99.818 | 144.05 |
| 350.0/450.0 | 213.97 | 124.31 | 125.8 | 90.934 | 133.61 |
| 360.0/460.0 | 186.73 | 111 | 111.5 | 80.339 | 120.53 |
| 370.0/470.0 | 147.4 | 87.235 | 93.49 | 66.633 | 100.35 |
| 380.0/480.0 | 112.01 | 65.778 | 72.694 | 54.501 | 75.325 |
| 390.0/490.0 | 84.025 | 50.136 | 59.743 | 44.161 | 58.534 |
| 400.0/500.0 | 61.607 | 36.673 | 44.733 | 34.075 | 42.915 |
| 410.0/510.0 | 42.304 | 25.301 | 31.848 | 24.138 | 29.541 |
| 420.0/520.0 | 28.097 | 16.683 | 20.686 | 15.752 | 20.036 |
| 430.0/530.0 | 17.518 | 10.937 | 12.584 | 9.0452 | 11.597 |
| 440.0/540.0 | 11.066 | 6.8657 | 7.8292 | 5.3482 | 7.1244 |
| 450.0/550.0 | 7.3876 | 3.9287 | 4.5497 | 3.1094 | 4.2721 |
| 460.0/560.0 | 5.0687 | 2.4555 | 2.8754 | 1.7363 | 2.6241 |
| 470.0/570.0 | 3.1468 | 1.7681 | 2.1296 | 1.1781 | 1.7461 |
| 480.0/580.0 | 2.2649 | 1.1831 | 1.4857 | 0.6575 | 1.3522 |
| 490.0/590.0 | 1.4872 | 0.8888 | 0.9241 | 0.5686 | 0.8148 |
| 500.0/600.0 | 1.057 | 0.8624 | 0.8877 | 0.6386 | 0.925 |
| 510.0/610.0 | 0 | 0 | 0 | 0 | 0 |

**Table S6** Wavelength data of 3D fluorescence in R2.

| EX/EM(nm) | Stage Ⅰ | Stage Ⅱ | Stage Ⅲ | Stage Ⅳ | Stage Ⅴ |
| --- | --- | --- | --- | --- | --- |
| 220.0/320.0 | 13.039 | 13.011 | 12.78 | 10.486 | 26.461 |
| 230.0/330.0 | 5.68 | 4.3023 | 8.5844 | 4.8973 | 2.3897 |
| 240.0/340.0 | 19.224 | 10.796 | 15.482 | 11.922 | 12.058 |
| 250.0/350.0 | 56.876 | 19.604 | 24.869 | 21.634 | 28.42 |
| 260.0/360.0 | 123.41 | 53.343 | 60.562 | 50.742 | 71.898 |
| 270.0/370.0 | 218.7 | 90.299 | 95.441 | 89.637 | 104.55 |
| 280.0/380.0 | 262.5 | 123.98 | 128.79 | 95.551 | 139.77 |
| 290.0/390.0 | 283.73 | 135.7 | 143.28 | 118.39 | 157.09 |
| 300.0/400.0 | 296.52 | 153.27 | 156.5 | 133.84 | 148.91 |
| 310.0/410.0 | 298.94 | 156.75 | 158.49 | 128.25 | 159.29 |
| 320.0/420.0 | 277.23 | 147.88 | 150.47 | 117.78 | 149.62 |
| 330.0/430.0 | 248.69 | 134.4 | 139.01 | 115.28 | 148.28 |
| 340.0/440.0 | 229.1 | 125.27 | 132.81 | 108.73 | 139.52 |
| 350.0/450.0 | 209.05 | 112.25 | 120.47 | 104.64 | 130.85 |
| 360.0/460.0 | 179.47 | 100.45 | 105.27 | 90.214 | 114.22 |
| 370.0/470.0 | 144.79 | 80.182 | 83.236 | 69.553 | 88.892 |
| 380.0/480.0 | 109.91 | 61.663 | 60.251 | 48.303 | 61.507 |
| 390.0/490.0 | 84.623 | 48.817 | 47.127 | 34.106 | 43.501 |
| 400.0/500.0 | 60.827 | 36.176 | 35.931 | 23.229 | 27.996 |
| 410.0/510.0 | 42.664 | 26.374 | 26.41 | 14.393 | 18.263 |
| 420.0/520.0 | 27.489 | 17.574 | 18.056 | 9.5111 | 11.98 |
| 430.0/530.0 | 17.076 | 10.493 | 11.245 | 6.9192 | 7.88 |
| 440.0/540.0 | 10.838 | 6.6792 | 6.8077 | 4.5982 | 5.6042 |
| 450.0/550.0 | 7.0428 | 3.9895 | 3.8099 | 3.0637 | 3.4254 |
| 460.0/560.0 | 4.8082 | 2.362 | 2.5468 | 1.974 | 2.0838 |
| 470.0/570.0 | 3.3572 | 1.7905 | 1.7051 | 1.2941 | 1.56 |
| 480.0/580.0 | 2.2117 | 1.0144 | 0.9535 | 0.7683 | 0.8113 |
| 490.0/590.0 | 1.643 | 0.8937 | 0.7316 | 0.695 | 0.6164 |
| 500.0/600.0 | 1.0202 | 0.6127 | 0.7819 | 0.6095 | 0.4938 |
| 510.0/610.0 | 0 | 0 | 0 | 0 | 0 |

**Table S7** Average proportion of different components of VFAs in influent and effluent of R1 from stage Ⅵ to Ⅷ.

|  | | Acetate | propionate | Iso-butyrate | Butyrate | Iso-valerate | Valerate |
| --- | --- | --- | --- | --- | --- | --- | --- |
| Stage Ⅵ | Influent | 24.05 | 53.82 | 7.22 | 1.15 | 11.88 | 1.88 |
| Effluent | 25.19 | 52.09 | 6.72 | 1.79 | 11.86 | 2.35 |
| Variate | 1.14 | -1.73 | -0.50 | 0.64 | -0.02 | 0.47 |
| Stage Ⅶ | Influent | 28.87 | 43.25 | 7.21 | 4.96 | 10.75 | 4.96 |
| Effluent | 32.46 | 41.41 | 6.20 | 4.02 | 11.45 | 4.46 |
| Variate | 3.59 | -1.84 | -1.01 | -0.94 | 0.70 | -0.50 |
| Stage Ⅷ | Influent | 29.22 | 46.11 | 7.70 | 1.46 | 12.64 | 2.86 |
| Effluent | 32.73 | 45.81 | 6.62 | 1.46 | 10.59 | 2.78 |
| Variate | 3.51 | -0.30 | -1.08 | 0 | -2.05 | -0.08 |

**Table S8** Relative content of protein secondary structure.

|  | α-helix | β-sheet | β-turn | Random coil |
| --- | --- | --- | --- | --- |
| Stage Ⅵ | 15.34% | 51.61% | 13.89% | 19.16% |
| Stage Ⅶ | 17.30% | 48.16% | 13.90% | 20.65% |
| Stage Ⅷ | 16.76% | 52.19% | 13.48% | 17.57% |

**Table S9** Organic matter diagram of influent in R1.

| Number | Retention time (min) | Compound name | Molecular formula | CAS | Molecular weight |
| --- | --- | --- | --- | --- | --- |
| 1 | 1.525 | (2-Aziridinylethyl)amine | C4H10N2 | 4025-37-0 | 86.084 |
| 2 | 2.456 | Arsine | AsH3 | 7784-42-1 | 77.945 |
| 3 | 3.349 | Acetone | C3H6O | 67-64-1 | 58.042 |
| 4 | 4.748 | 2-Butanone | C4H8O | 78-93-3 | 72.058 |
| 5 | 5.326 | Ethane, 1,2-dimethoxy- | C4H10O2 | 110-71-4 | 90.068 |
| 6 | 6.692 | 2-Pentanone | C5H10O | 107-87-9 | 86.073 |
| 7 | 7.48 | Methyl Isobutyl Ketone | C6H12O | 108-10-1 | 100.089 |
| 8 | 9.81 | 2-Hexanone | C6H12O | 591-78-6 | 100.089 |
| 9 | 13.077 | 2-Heptanone | C7H14O | 110-43-0 | 114.104 |
| 10 | 16.057 | Methylal | C3H8O2 | 109-87-5 | 76.052 |
| 11 | 16.277 | 2-Octanone | C8H16O | 111-13-7 | 128.12 |
| 12 | 16.481 | Cyclohexanone | C6H10O | 108-94-1 | 98.073 |
| 13 | 16.586 | Decane, 5-propyl- | C13H28 | 17312-62-8 | 184.219 |
| 14 | 17.781 | 5-Hepten-2-one, 6-methyl- | C8H14O | 110-93-0 | 126.104 |
| 15 | 18.663 | Ethanol, 2-[2-(2-ethoxyethoxy)ethoxy]- | C8H18O4 | 112-50-5 | 178.121 |
| 16 | 18.977 | Cyclohexanone, 3,3,5-trimethyl- | C9H16O | 873-94-9 | 140.12 |
| 17 | 19.203 | 3,6-Heptadien-2-ol, 2,5,5-trimethyl-, (E)- | C10H18O | 26127-98-0 | 154.136 |
| 18 | 19.384 | Cyclohexanol | C6H12O | 108-93-0 | 100.089 |
| 19 | 19.99 | 3-Heptyne-2,6-dione, 5-methyl-5-(1-methylethyl)- | C11H16O2 | 63922-44-1 | 180.115 |
| 20 | 20.409 | trans-Linalool oxide (furanoid) | C10H18O2 | 34995-77-2 | 170.131 |
| 21 | 20.514 | Benzene, 1,2,3,4-tetramethyl- | C10H14 | 488-23-3 | 134.11 |
| 22 | 20.618 | Cyclohexanol, 3-methyl- | C7H14O | 591-23-1 | 114.104 |
| 23 | 20.773 | Furan, 2,3,5-trimethyl- | C7H10O | 10504-04-8 | 110.073 |
| 24 | 20.883 | Bicyclo[3.1.0]hexan-2-ol, 2-methyl-5-(1-methylethyl)-, (1.alpha.,2.alpha.,5.alpha.)- | C10H18O | 17699-16-0 | 154.136 |
| 25 | 20.943 | Bis(2-chloro-1-methylethyl) ether | C6H12Cl2O | 1010022-03-6 | 170.027 |
| 26 | 21.053 | trans-Linalool oxide (furanoid) | C10H18O2 | 34995-77-2 | 170.131 |
| 27 | 21.125 | Bis(2-chloro-1-methylethyl) ether | C6H12Cl2O | 1010022-03-6 | 170.027 |
| 28 | 21.323 | 1-Hexanethiol, 2-ethyl- | C8H18S | 7341-17-5 | 146.113 |
| 29 | 21.659 | L-Menthone | C10H18O | 14073-97-3 | 154.136 |
| 30 | 21.759 | Benzofuran, 2,3-dihydro-2-methyl- | C9H10O | 1746-11-8 | 134.073 |
| 31 | 21.968 | 6-Aminonicotinic acid,N,O di-TMS | C12H22N2O2Si2 | 1000472-37-7 | 282.122 |
| 32 | 22.155 | (+)-2-Bornanone | C10H16O | 464-49-3 | 152.12 |
| 33 | 22.409 | 3-Ethoxy-1-(2-methyl-cyclohexyl)-butan-2-ol | C13H26O2 | 1000194-25-4 | 214.193 |
| 34 | 22.491 | Cyclohexanol, 3,3,5-trimethyl-, cis- | C9H18O | 933-48-2 | 142.136 |
| 35 | 22.651 | Benzaldehyde | C7H6O | 100-52-7 | 106.042 |
| 36 | 22.866 | (S)-Methyl 2,3-dihydroxypropanoate, methyl ether | C5H10O4 | 354578-58-8 | 134.058 |
| 37 | 23.108 | Citronellal | C10H18O | 106-23-0 | 154.136 |
| 38 | 23.411 | n-Caproic acid vinyl ester | C8H14O2 | 3050-69-9 | 142.099 |
| 39 | 23.477 | 3-Buten-2-one, 4-(2-hydroxy-2,6,6-trimethylcyclohexyl)- | C13H22O2 | 55955-46-9 | 210.162 |
| 40 | 23.604 | Terpinen-4-ol | C10H18O | 562-74-3 | 154.136 |
| 41 | 23.775 | Isophorone | C9H14O | 78-59-1 | 138.104 |
| 42 | 23.979 | Decanoic acid, 2-hydroxy- | C10H20O3 | 5393-81-7 | 188.141 |
| 43 | 24.144 | Cyclohexanol, 5-methyl-2-(1-methylethyl)- | C10H20O | 1490-04-6 | 156.151 |
| 44 | 24.392 | Bicyclo[3.1.1]heptan-2-one, 3,6,6-trimethyl- | C10H16O | 16022-08-5 | 152.12 |
| 45 | 24.524 | 2-Propanol, 1-(2-butoxy-1-methylethoxy)- | C10H22O3 | 29911-28-2 | 190.157 |
| 46 | 24.717 | Acetophenone | C8H8O | 98-86-2 | 120.058 |
| 47 | 25.064 | .alpha.-Terpineol | C10H18O | 98-55-5 | 154.136 |
| 48 | 25.284 | 2-Methyl-3-propenylcyclopropanecarboxylic acid, methyl ester | C9H14O2 | 118316-01-1 | 154.099 |
| 49 | 25.515 | 3,5-Heptadienal, 2-ethylidene-6-methyl- | C10H14O | 99172-18-6 | 150.104 |
| 50 | 25.598 | 2H-Pyran-3-ol, 6-ethenyltetrahydro-2,2,6-trimethyl- | C10H18O2 | 14049-11-7 | 170.131 |
| 51 | 25.719 | Benzyl methyl ketone | C9H10O | 103-79-7 | 134.073 |
| 52 | 25.813 | Cyclohexanol, 2-methyl-5-(1-methylethenyl)-, [1S-(1.alpha.,2.beta.,5.alpha.)]- | C10H18O | 22567-21-1 | 154.136 |
| 53 | 25.868 | (3R,6R)-2,2,6-Trimethyl-6-vinyltetrahydro-2H-pyran-3-ol | C10H18O2 | 14009-71-3 | 170.131 |
| 54 | 25.912 | Benzenemethanol, .alpha.,.alpha.-dimethyl- | C9H12O | 617-94-7 | 136.089 |
| 55 | 26.077 | R-(+)-Ethyl-2-isopropyl-5-oxohexanoate | C11H20O3 | 1000108-54-8 | 200.141 |
| 56 | 26.226 | Phenol, 2-chloro-5-methyl- | C7H7ClO | 615-74-7 | 142.019 |
| 57 | 26.314 | Isobutyramide, N-propyl- | C7H15NO | 1000407-08-5 | 129.115 |
| 58 | 26.375 | Pentanoic acid, 4-methyl- | C6H12O2 | 646-07-1 | 116.084 |
| 59 | 26.468 | Perilla ketone | C10H14O2 | 553-84-4 | 166.099 |
| 60 | 26.551 | Octanoic acid, 2-isopropoxyphenyl ester | C17H26O3 | 1000293-62-9 | 278.188 |
| 61 | 26.661 | Benzenemethanol, .alpha.-methyl- | C8H10O | 98-85-1 | 122.073 |
| 62 | 26.981 | Benzenemethanol, .alpha.,.alpha.,4-trimethyl- | C10H14O | 1197-01-9 | 150.104 |
| 63 | 27.146 | N,2,3-Trimethyl-2-isopropylbutanamide | C10H21NO | 51115-67-4 | 171.162 |
| 64 | 27.201 | 2,7-Cyclodecadiene-1-methanol, .alpha.,.alpha.,4,8-tetramethyl- | C15H26O | 60441-29-4 | 222.198 |
| 65 | 27.273 | Propanoic acid, 2-methyl-, 3-hydroxy-2,2,4-trimethylpentyl ester | C12H24O3 | 77-68-9 | 216.173 |
| 66 | 27.444 | 2-Butanone, 4-phenyl- | C10H12O | 2550-26-7 | 148.089 |
| 67 | 27.532 | 2,2,4-Trimethyl-1,3-pentanediol diisobutyrate | C16H30O4 | 6846-50-0 | 286.214 |
| 68 | 27.746 | 4,6-di-tert-Butyl-m-cresol | C15H24O | 497-39-2 | 220.183 |
| 69 | 27.879 | Phenol, 2,6-dimethyl- | C8H10O | 576-26-1 | 122.073 |
| 70 | 28.055 | Hexanoic acid, 2-ethyl- | C8H16O2 | 149-57-5 | 144.115 |
| 71 | 28.176 | n-Octylpentaoxyethylene | C18H38O6 | 19327-40-3 | 350.267 |
| 72 | 28.297 | 2-Ethoxy-4-methylphenol | C9H12O2 | 2563-07-7 | 152.084 |
| 73 | 28.716 | 8-Hydroxytricyclo(5.2.1.02,6)-4-decene | C10H14O | 133-21-1 | 150.104 |
| 74 | 28.848 | Phenol, 2-methyl- | C7H8O | 95-48-7 | 108.058 |
| 75 | 28.898 | Phenol | C6H6O | 108-95-2 | 94.042 |
| 76 | 29.063 | Isopropyl myristate | C17H34O2 | 110-27-0 | 270.256 |
| 77 | 29.223 | 4-Methyl-1-(1,2,2-trimethylcyclopentyl)cyclohex-3-enol | C15H26O | 943525-66-4 | 222.198 |
| 78 | 29.36 | Phenol, 2,3,6-trimethyl- | C9H12O | 2416-94-6 | 136.089 |
| 79 | 29.427 | Thiophene, 2-ethyl-5-heptyl- | C13H22S | 5206-09-7 | 210.144 |
| 80 | 29.509 | Phenol, 2-ethyl- | C8H10O | 90-00-6 | 122.073 |
| 81 | 29.57 | Thiophene, 2-ethyl-5-heptyl- | C13H22S | 5206-09-7 | 210.144 |
| 82 | 29.691 | p-Cresol | C7H8O | 106-44-5 | 108.058 |
| 83 | 29.796 | dl-Erythro-1-phenyl-1,2-propanediol | C9H12O2 | 1075-04-3 | 152.084 |
| 84 | 30.413 | Imidazole, 1,4-dimethyl-2-phenyl- | C11H12N2 | 1000129-12-9 | 172.1 |
| 85 | 30.694 | Phenol, 4-ethyl- | C8H10O | 123-07-9 | 122.073 |
| 86 | 30.787 | Phenol, 3-ethyl- | C8H10O | 620-17-7 | 122.073 |
| 87 | 31.008 | Carbofuran | C12H15NO3 | 1563-66-2 | 221.105 |
| 88 | 31.189 | Phenol, 2-(1-methylethyl)- | C9H12O | 88-69-7 | 136.089 |
| 89 | 31.592 | Ethanone, 1-(2-aminophenyl)- | C8H9NO | 551-93-9 | 135.068 |
| 90 | 31.751 | Phenol, 3-propyl- | C9H12O | 621-27-2 | 136.089 |
| 91 | 32.005 | Oxirane, [[4-(1,1-dimethylethyl)phenoxy]methyl]- | C13H18O2 | 3101-60-8 | 206.131 |
| 92 | 32.319 | Diethyltoluamide | C12H17NO | 134-62-3 | 191.131 |
| 93 | 32.5 | 1H-Indole, 1-acetyl-2,3-dihydro-5-nitro- | C10H10N2O3 | 33632-27-8 | 206.069 |
| 94 | 33.035 | 1-Benzyl-5-methylimidazole | C11H12N2 | 52726-21-3 | 172.1 |
| 95 | 33.261 | 15,15'-Bi-1,4,7,10,13-pentaoxacyclohexadecane | C22H42O10 | 109773-67-3 | 466.278 |
| 96 | 33.575 | 1,5,5-Trimethyl-6-[2-(2-methyl-[1,3]dioxolan-2-yl)-vinyl]-4-methylene-7-oxa-bicyclo[4.1.0]hept-2-ene | C16H22O3 | 1000192-69-5 | 262.157 |
| 97 | 34.059 | Phenol, 4-chloro-2-methyl- | C7H7ClO | 1570-64-5 | 142.019 |
| 98 | 34.335 | Phenol, 4-chloro- | C6H5ClO | 106-48-9 | 128.003 |
| 99 | 35.447 | 1H-Indole, 2-methyl- | C9H9N | 95-20-5 | 131.073 |
| 100 | 36.395 | 2-Hexadecanol | C16H34O | 14852-31-4 | 242.261 |
| 101 | 37.756 | Heptaethylene glycol monododecyl ether | C26H54O8 | 3055-97-8 | 494.382 |

**Table S10** Organic matter of effluent in R1 at stage Ⅵ.

| Number | Retention time  (min) | Compound name | Molecular formula | CAS | Molecular weight |
| --- | --- | --- | --- | --- | --- |
| 1 | 0.413 | Arsine | AsH3 | 7784-42-1 | 77.945 |
| 2 | 1.04 | Acetone | C3H6O | 67-64-1 | 58.042 |
| 3 | 2.434 | 2-Butanone | C4H8O | 78-93-3 | 72.058 |
| 4 | 3.53 | Ethyne, fluoro- | C2HF | 2713-09-9 | 44.006 |
| 5 | 4.324 | 2-Pentanone | C5H10O | 107-87-9 | 86.073 |
| 6 | 5.739 | 2-Butanol, (R)- | C4H10O | 14898-79-4 | 74.073 |
| 7 | 6.037 | 2-Cyclopenten-1-one, 2-hydroxy-3,4-dimethyl- | C7H10O2 | 21835-00-7 | 126.068 |
| 8 | 6.23 | 1,1,1,3,3,3-Hexafluoro-2-(1-methoxycarbonyl)-ethoxyiminopropane | C7H7F6NO3 | 91411-95-9 | 267.033 |
| 9 | 6.505 | 1,2,4-Benzenetricarboxylic acid, 1,2-dimethyl ester | C11H10O6 | 54699-35-3 | 238.048 |
| 10 | 7.397 | 2-Hexanone | C6H12O | 591-78-6 | 100.089 |
| 11 | 7.833 | Furan, 2,3-dihydro-4-methyl- | C5H8O | 34314-83-5 | 84.058 |
| 12 | 8.042 | Methyltris(trimethylsiloxy)silane | C10H30O3Si4 | 17928-28-8 | 310.127 |
| 13 | 8.659 | (R)-(-)-2-Pentanol | C5H12O | 31087-44-2 | 88.089 |
| 14 | 10.631 | 2-Heptanone | C7H14O | 110-43-0 | 114.104 |
| 15 | 11.11 | Octane, 2,4,6-trimethyl- | C11H24 | 62016-37-9 | 156.188 |
| 16 | 11.479 | 4-Ethylbenzamide | C9H11NO | 33695-58-8 | 149.084 |
| 17 | 12.57 | 2,6-Lutidine | C7H9N | 108-48-5 | 107.073 |
| 18 | 13.721 | Methylal | C3H8O2 | 109-87-5 | 76.052 |
| 19 | 13.936 | Cyclohexanone | C6H10O | 108-94-1 | 98.073 |
| 20 | 14.151 | 2,2-di-n-Propylacetyl chloride | C8H15ClO | 2936-08-5 | 162.081 |
| 21 | 14.267 | Cyclohexane, 1,2-dimethyl-, trans- | C8H16 | 6876-23-9 | 112.125 |
| 22 | 14.404 | 7-Octene-2,4-dione | C8H12O2 | 10151-22-1 | 140.084 |
| 23 | 14.564 | Silane, diethyl(2-ethoxyethyloxy)octadecyloxy- | C26H56O3Si | 1000363-52-8 | 444.4 |
| 24 | 14.801 | 1-Hepten-6-one, 2-methyl- | C8H14O | 10408-15-8 | 126.104 |
| 25 | 15.121 | Pyridine, 2,3-dimethyl- | C7H9N | 583-61-9 | 107.073 |
| 26 | 15.368 | 5-Hepten-2-one, 6-methyl- | C8H14O | 110-93-0 | 126.104 |
| 27 | 15.76 | Benzenemethanamine, N,N-dimethyl- | C9H13N | 103-83-3 | 135.105 |
| 28 | 16.013 | Pyridine, 2,4,6-trimethyl- | C8H11N | 108-75-8 | 121.089 |
| 29 | 16.288 | Diethyl carbitol | C8H18O3 | 112-36-7 | 162.126 |
| 30 | 16.382 | Cyclohexanone, 3,3,5-trimethyl- | C9H16O | 873-94-9 | 140.12 |
| 31 | 16.465 | Pyridine, 3-ethyl- | C7H9N | 536-78-7 | 107.073 |
| 32 | 16.702 | Hexanoic acid, oct-3-en-2-yl ester | C14H26O2 | 1000299-35-5 | 226.193 |
| 33 | 16.79 | 2-Nonanone | C9H18O | 821-55-6 | 142.136 |
| 34 | 16.949 | Nonanal | C9H18O | 124-19-6 | 142.136 |
| 35 | 17.159 | Cyclohexanol | C6H12O | 108-93-0 | 100.089 |
| 36 | 17.357 | 2-Ethyl-3,5-dimethylpyridine | C9H13N | 1123-96-2 | 135.105 |
| 37 | 17.787 | 3-Heptyne-2,6-dione, 5-methyl-5-(1-methylethyl)- | C11H16O2 | 63922-44-1 | 180.115 |
| 38 | 18.09 | Benzene, 1,2,4,5-tetramethyl- | C10H14 | 95-93-2 | 134.11 |
| 39 | 18.227 | trans-Linalool oxide (furanoid) | C10H18O2 | 34995-77-2 | 170.131 |
| 40 | 18.767 | 6-Octenal, 3,7-dimethyl-, (R)- | C10H18O | 2385-77-5 | 154.136 |
| 41 | 18.96 | trans-Linalool oxide (furanoid) | C10H18O2 | 34995-77-2 | 170.131 |
| 42 | 19.12 | Bis(2-chloro-1-methylethyl) ether | C6H12Cl2O | 1010022-03-6 | 170.027 |
| 43 | 19.252 | 2-Propanol, 1-(2-methoxy-1-methylethoxy)- | C7H16O3 | 20324-32-7 | 148.11 |
| 44 | 19.395 | 2-Ethyl-1-hexanol, pentafluoropropionate | C11H17F5O2 | 959012-82-9 | 276.115 |
| 45 | 19.461 | Cyclohexanone, 5-methyl-2-(1-methylethyl)-, cis- | C10H18O | 491-07-6 | 154.136 |
| 46 | 19.528 | (E)-4-(2,4,6-Trimethylcyclohex-3-en-1-yl)but-3-en-2-one | C13H20O | 1000498-55-5 | 192.151 |
| 47 | 19.599 | 2-Cyclopenten-1-one, 3,4,4-trimethyl- | C8H12O | 30434-65-2 | 124.089 |
| 48 | 19.897 | 4-Penten-1-one, 1-(1H-imidazol-4-yl)- | C8H10N2O | 69393-39-1 | 150.079 |
| 49 | 20.04 | (+)-2-Bornanone | C10H16O | 464-49-3 | 152.12 |
| 50 | 20.144 | 2,5-Dihydroxybenzaldehyde, 2TMS derivative | C13H22O3Si2 | 56114-69-3 | 282.111 |
| 51 | 20.304 | Benzaldehyde | C7H6O | 100-52-7 | 106.042 |
| 52 | 20.552 | Cyclohexanol, 3,3,5-trimethyl-, cis- | C9H18O | 933-48-2 | 142.136 |
| 53 | 20.646 | Bicyclo[3.1.0]hexan-2-ol, 2-methyl-5-(1-methylethyl)-, (1.alpha.,2.alpha.,5.alpha.)- | C10H18O | 17699-16-0 | 154.136 |
| 54 | 20.828 | 4-Acetyl-1-methylcyclohexene | C9H14O | 6090-09-1 | 138.104 |
| 55 | 20.949 | (S)-Methyl 2,3-dihydroxypropanoate, methyl ether | C5H10O4 | 354578-58-8 | 134.058 |
| 56 | 21.12 | 4-Amino-2-methoxy-5-nitrobenzoic acid, N-trimethylsilyl-, trimethylsilyl ester | C14H24N2O5Si2 | 1000501-32-8 | 356.122 |
| 57 | 21.197 | Cyclohexene,3-propyl- | C9H16 | 3983-06-0 | 124.125 |
| 58 | 21.318 | Cyclopropane, 2-(1,1-dimethyl-2-pentenyl)-1,1-dimethyl- | C12H22 | 74663-76-6 | 166.172 |
| 59 | 21.406 | Hexanoic acid, anhydride | C12H22O3 | 2051-49-2 | 214.157 |
| 60 | 21.582 | Isophorone | C9H14O | 78-59-1 | 138.104 |
| 61 | 21.709 | Terpinen-4-ol | C10H18O | 562-74-3 | 154.136 |
| 62 | 21.995 | 2-Acetyl-5-methylfuran | C7H8O2 | 1193-79-9 | 124.052 |
| 63 | 22.144 | Propanoic acid, 2-methyl-, 2-ethyl-3-hydroxyhexyl ester | C12H24O3 | 74367-31-0 | 216.173 |
| 64 | 22.32 | Cyclohexanol, 5-methyl-2-(1-methylethyl)- | C10H20O | 1490-04-6 | 156.151 |
| 65 | 22.634 | Acetophenone | C8H8O | 98-86-2 | 120.058 |
| 66 | 22.7 | 2-Propanol, 1-(2-butoxy-1-methylethoxy)- | C10H22O3 | 29911-28-2 | 190.157 |
| 67 | 22.772 | Acetamide, N-(4,6,6-trimethylbicyclo[3.1.1]hept-3-en-2-yl)-, (1.alpha.,2.beta.,5.alpha.)- | C12H19NO | 133180-86-6 | 193.147 |
| 68 | 22.877 | 2-Propanol, 1-(2-butoxy-1-methylethoxy)- | C10H22O3 | 29911-28-2 | 190.157 |
| 69 | 22.926 | 1,1'-Bicyclohexyl-1,1'-diol | C12H22O2 | 2888-11-1 | 198.162 |
| 70 | 23.103 | 2,3a-Dimethylhexahydrobenzofuran-7a-ol | C10H18O2 | 1000186-53-6 | 170.131 |
| 71 | 23.24 | L-.alpha.-Terpineol | C10H18O | 10482-56-1 | 154.136 |
| 72 | 23.339 | endo-Borneol | C10H18O | 507-70-0 | 154.136 |
| 73 | 23.472 | Bicyclo[3.1.1]hept-3-en-2-one, 4,6,6-trimethyl-, (1S)- | C10H14O | 1196-01-6 | 150.104 |
| 74 | 23.598 | Hexanoic acid, 2-methyl- | C7H14O2 | 4536-23-6 | 130.099 |
| 75 | 23.736 | Phenylglyoxylic Acid, 3-methylbutyl ester | C13H16O3 | 1000453-46-1 | 220.11 |
| 76 | 23.885 | diallyl(2,2,4a,7,7-pentamethyl-1,2,3,4,4a,5,6,7-octahydro[1,8]naphthyridin-1-yl)phosphate | C19H33N2O4P | 1000187-42-4 | 384.218 |
| 77 | 24.028 | 1-Cyclohexylcyclohexane-1-carboxylic acid | C13H22O2 | 60263-54-9 | 210.162 |
| 78 | 24.16 | Benzenemethanol, .alpha.,.alpha.-dimethyl- | C9H12O | 617-94-7 | 136.089 |
| 79 | 24.221 | Aniline | C6H7N | 62-53-3 | 93.058 |
| 80 | 24.309 | Octanoic acid, 7-oxo-, methyl ester | C9H16O3 | 16493-42-8 | 172.11 |
| 81 | 24.392 | 2-Chloro-4-methylphenol, O-(n-propyloxycarbonyl)- | C11H13ClO3 | 1000487-23-2 | 228.055 |
| 82 | 24.463 | Ethanone, 1-(2-methylphenyl)- | C9H10O | 577-16-2 | 134.073 |
| 83 | 24.656 | Perilla ketone | C10H14O2 | 553-84-4 | 166.099 |
| 84 | 24.788 | Cyclohexanol, 2-methyl-5-(1-methylethenyl)- | C10H18O | 619-01-2 | 154.136 |
| 85 | 24.898 | Benzenemethanol, .alpha.-methyl- | C8H10O | 98-85-1 | 122.073 |
| 86 | 24.998 | Benzaldehyde, 3,4-dimethyl- | C9H10O | 5973-71-7 | 134.073 |
| 87 | 25.113 | Anethole | C10H12O | 104-46-1 | 148.089 |
| 88 | 25.262 | N,2,3-Trimethyl-2-isopropylbutanamide | C10H21NO | 51115-67-4 | 171.162 |
| 89 | 25.328 | Propanoic acid, 2-chloro-, 1-methylbutyl ester | C8H15ClO2 | 88736-64-5 | 178.076 |
| 90 | 25.438 | 13-Tetradecynoic acid, methyl ester | C15H26O2 | 56909-03-6 | 238.193 |
| 91 | 25.526 | Propanoic acid, 2-methyl-, 3-hydroxy-2,2,4-trimethylpentyl ester | C12H24O3 | 77-68-9 | 216.173 |
| 92 | 25.763 | 2,2,4-Trimethyl-1,3-pentanediol diisobutyrate | C16H30O4 | 6846-50-0 | 286.214 |
| 93 | 25.956 | 3-Hydroxy-2,6,6-trimethyl-cyclohexene-1-carboxylic acid | C10H16O3 | 141040-72-4 | 184.11 |
| 94 | 26.072 | Butylated Hydroxytoluene | C15H24O | 128-37-0 | 220.183 |
| 95 | 26.435 | 4H-Chromene, 4a,5,6,7,8,8a-hexahydro-2,3,5,5,8a-pentamethyl | C14H24O | 1000196-77-4 | 208.183 |
| 96 | 26.529 | Cyclopropyl (2,5-dimethylphenyl) carbinol | C12H16O | 78987-81-2 | 176.12 |
| 97 | 26.777 | 4-Hydroxy-.beta.-ionone | C13H20O2 | 116296-75-4 | 208.146 |
| 98 | 26.843 | Quinoline, 2-methyl- | C10H9N | 91-63-4 | 143.073 |
| 99 | 26.926 | 8-Hydroxytricyclo(5.2.1.02,6)-4-decene | C10H14O | 133-21-1 | 150.104 |
| 100 | 27.047 | 3(2H)-Furanone, 2-hexyl-5-methyl- | C11H18O2 | 33922-66-6 | 182.131 |
| 101 | 27.162 | Phenol, 2-methyl- | C7H8O | 95-48-7 | 108.058 |
| 102 | 27.229 | Phenol | C6H6O | 108-95-2 | 94.042 |
| 103 | 27.471 | 2-Isopropyl-5-methyl-6-oxabicyclo[3.1.0]hexane-1-carboxaldehyde | C10H16O2 | 1000186-21-3 | 168.115 |
| 104 | 27.62 | Thiophene, 2-ethyl-5-heptyl- | C13H22S | 5206-09-7 | 210.144 |
| 105 | 27.708 | 3,4-Dihydroxymandelic acid, 4TMS derivative | C20H40O5Si4 | 37148-65-5 | 472.195 |
| 106 | 27.851 | Phenol, 2-ethyl- | C8H10O | 90-00-6 | 122.073 |
| 107 | 28.005 | Phenol, 3-methyl- | C7H8O | 108-39-4 | 108.058 |
| 108 | 28.925 | Phenol, 4-ethyl- | C8H10O | 123-07-9 | 122.073 |
| 109 | 29.002 | Phenol, 3-ethyl- | C8H10O | 620-17-7 | 122.073 |
| 110 | 29.146 | 7-Benzofuranol, 2,3-dihydro-2,2-dimethyl- | C10H12O2 | 1563-38-8 | 164.084 |
| 111 | 29.245 | Thymol | C10H14O | 89-83-8 | 150.104 |
| 112 | 29.349 | Phenol, 2-(1-methylethyl)-, methylcarbamate | C11H15NO2 | 2631-40-5 | 193.11 |
| 113 | 29.46 | Ethanone, 1-(2-aminophenyl)- | C8H9NO | 551-93-9 | 135.068 |
| 114 | 29.807 | Phenol, 3-propyl- | C9H12O | 621-27-2 | 136.089 |
| 115 | 30.021 | 5-Isopropyl-2-methylphenyl carbanilate | C17H19NO2 | 1155-45-9 | 269.142 |
| 116 | 30.099 | 2,4-Di-tert-butylphenol | C14H22O | 96-76-4 | 206.167 |
| 117 | 30.22 | 2-(1-Benzothiophen-3-yl)-N'-hydroxyethanimidamide | C10H10N2OS | 24035-76-5 | 206.051 |
| 118 | 30.495 | ((1R,4S,5R,8S,9R)-4-Isopropyl-6,8,9-trimethyl-3-oxabicyclo[3.3.1]non-6-en-1-yl)methanol, TMS | C18H34O2Si | 1000498-96-7 | 310.233 |
| 119 | 30.699 | Uvidin C | C15H26O3 | 74635-85-1 | 254.188 |
| 120 | 30.925 | Tricyclo[6.3.0.0(2,6)]undecan-10-one, 3-[(2-methoxyethoxy)methoxy]-2-methyl- | C16H26O4 | 1000154-00-0 | 282.183 |
| 121 | 31.465 | Hexahydro-3-butylphthalide | C12H20O2 | 3553-34-2 | 196.146 |
| 122 | 31.63 | Phenol, 4-chloro-2-methyl- | C7H7ClO | 1570-64-5 | 142.019 |
| 123 | 31.85 | Phenol, 4-chloro- | C6H5ClO | 106-48-9 | 128.003 |
| 124 | 32.021 | Indole | C8H7N | 120-72-9 | 117.058 |
| 125 | 32.627 | 1H-Indole, 2-methyl- | C9H9N | 95-20-5 | 131.073 |
| 126 | 35.8 | Silane, 1,3-heptadiynyltrimethyl- | C10H16Si | 19024-47-6 | 164.102 |

**Table S11** Organic matter of effluent in R1 at stage Ⅶ.

| Number | Retention time  (min) | Compound name | Molecular formula | CAS | Molecular weight |
| --- | --- | --- | --- | --- | --- |
| 1 | 0.407 | Carbon disulfide | CS2 | 75-15-0 | 75.944 |
| 2 | 1.052 | Acetone | C3H6O | 67-64-1 | 58.042 |
| 3 | 2.445 | 2-Butanone | C4H8O | 78-93-3 | 72.058 |
| 4 | 3.646 | 1-Propanol, 2-amino-, (.+/-.)- | C3H9NO | 6168-72-5 | 75.068 |
| 5 | 4.335 | 2-Pentanone | C5H10O | 107-87-9 | 86.073 |
| 6 | 5.155 | Methyl Isobutyl Ketone | C6H12O | 108-10-1 | 100.089 |
| 7 | 5.745 | 2-Butanol, (R)- | C4H10O | 14898-79-4 | 74.073 |
| 8 | 6.048 | Ethanone, 1-(3-ethylcyclobutyl)- | C8H14O | 56335-71-8 | 126.104 |
| 9 | 11.116 | Dodecane | C12H26 | 112-40-3 | 170.203 |
| 10 | 11.479 | Thioglycolic acid, tert-butyldimethylsilyl ester | C8H18O2SSi | 1000476-01-2 | 206.08 |
| 11 | 11.573 | Pyridine, 2-methyl- | C6H7N | 109-06-8 | 93.058 |
| 12 | 11.727 | 2-Propionyl-6-methyl-3,4-dihydropyran | C9H14O2 | 1000145-07-7 | 154.099 |
| 13 | 12.262 | Hexanoic acid, ethyl ester | C8H16O2 | 123-66-0 | 144.115 |
| 14 | 12.576 | Pyridine, 2,3-dimethyl- | C7H9N | 583-61-9 | 107.073 |
| 15 | 12.702 | Sulfur dioxide | O2S | 7446-09-5 | 63.962 |
| 16 | 13.721 | Methylal | C3H8O2 | 109-87-5 | 76.052 |
| 17 | 13.942 | 4-(2-Piperidinoethyl)pyridine | C12H18N2 | 13450-67-4 | 190.147 |
| 18 | 14.146 | Tridecane | C13H28 | 629-50-5 | 184.219 |
| 19 | 15.115 | Pyridine, 2,5-dimethyl- | C7H9N | 589-93-5 | 107.073 |
| 20 | 15.374 | 5-Hepten-2-one, 6-methyl- | C8H14O | 110-93-0 | 126.104 |
| 21 | 15.749 | Benzenemethanamine, N,N-dimethyl- | C9H13N | 103-83-3 | 135.105 |
| 22 | 16.018 | Pyridine, 2,4,6-trimethyl- | C8H11N | 108-75-8 | 121.089 |
| 23 | 16.288 | Diethyl carbitol | C8H18O3 | 112-36-7 | 162.126 |
| 24 | 16.382 | Cyclohexanone, 3,3,5-trimethyl- | C9H16O | 873-94-9 | 140.12 |
| 25 | 16.465 | Pyridine, 3-ethyl- | C7H9N | 536-78-7 | 107.073 |
| 26 | 16.691 | 2,5-Dimethylhexane-2,5-dihydroperoxide | C8H18O4 | 3025-88-5 | 178.121 |
| 27 | 16.79 | 2-Nonanone | C9H18O | 821-55-6 | 142.136 |
| 28 | 16.944 | Bicyclo[3.1.0]hexan-3-ol, 4-methyl-1-(1-methylethyl)- | C10H18O | 513-23-5 | 154.136 |
| 29 | 17.159 | Cyclohexanol | C6H12O | 108-93-0 | 100.089 |
| 30 | 17.357 | 2-Ethyl-3,5-dimethylpyridine | C9H13N | 1123-96-2 | 135.105 |
| 31 | 17.787 | 3-Heptyne-2,6-dione, 5-methyl-5-(1-methylethyl)- | C11H16O2 | 63922-44-1 | 180.115 |
| 32 | 18.09 | p-Cymene | C10H14 | 99-87-6 | 134.11 |
| 33 | 18.227 | trans-Linalool oxide (furanoid) | C10H18O2 | 34995-77-2 | 170.131 |
| 34 | 18.574 | Ketone, isopropylidenecyclopropyl methyl | C8H12O | 29765-67-1 | 124.089 |
| 35 | 18.756 | 5-Hepten-2-ol, 6-methyl- | C8H16O | 1569-60-4 | 128.12 |
| 36 | 18.966 | trans-Linalool oxide (furanoid) | C10H18O2 | 34995-77-2 | 170.131 |
| 37 | 19.131 | Bis(2-chloro-1-methylethyl) ether | C6H12Cl2O | 1010022-03-6 | 170.027 |
| 38 | 19.395 | 1-Hexanol, 2-ethyl- | C8H18O | 104-76-7 | 130.136 |
| 39 | 19.533 | Methanol, [6,8,9-trimethyl-4-(1-propenyl)-3-oxabicyclo[3.3.1]non-6-en-1-yl]- | C15H24O2 | 1000277-60-9 | 236.178 |
| 40 | 19.599 | 1-(3-Methyl-2H-pyrazol-4-yl)ethanone | C6H8N2O | 1000436-16-2 | 124.064 |
| 41 | 19.83 | 3-Hydroxy-4-methoxybenzaldehyde, TBDMS | C14H22O3Si | 1000461-64-9 | 266.134 |
| 42 | 19.886 | 4-Penten-1-one, 1-(1H-imidazol-4-yl)- | C8H10N2O | 69393-39-1 | 150.079 |
| 43 | 20.04 | (+)-2-Bornanone | C10H16O | 464-49-3 | 152.12 |
| 44 | 20.144 | 2,5-Dihydroxybenzaldehyde, 2TMS derivative | C13H22O3Si2 | 56114-69-3 | 282.111 |
| 45 | 20.299 | Benzaldehyde | C7H6O | 100-52-7 | 106.042 |
| 46 | 20.558 | Cyclohexanol, 3,3,5-trimethyl-, cis- | C9H18O | 933-48-2 | 142.136 |
| 47 | 20.651 | Bicyclo[3.1.0]hexan-2-ol, 2-methyl-5-(1-methylethyl)-, (1.alpha.,2.alpha.,5.alpha.)- | C10H18O | 17699-16-0 | 154.136 |
| 48 | 20.822 | Cyclohexanol, 3,3,5-trimethyl-, acetate, cis- | C11H20O2 | 24691-16-5 | 184.146 |
| 49 | 20.949 | 2-Hexene, 6,6-dimethoxy-2,5,5-trimethyl- | C11H22O2 | 67674-46-8 | 186.162 |
| 50 | 21.119 | 4-Amino-2-methoxy-5-nitrobenzoic acid, N-trimethylsilyl-, trimethylsilyl ester | C14H24N2O5Si2 | 1000501-32-8 | 356.122 |
| 51 | 21.197 | Cyclohexanol, 2-(1-methylethyl)- | C9H18O | 96-07-1 | 142.136 |
| 52 | 21.318 | Cyclopropane, 2-(1,1-dimethyl-2-pentenyl)-1,1-dimethyl- | C12H22 | 74663-76-6 | 166.172 |
| 53 | 21.411 | Hexanoic acid, anhydride | C12H22O3 | 2051-49-2 | 214.157 |
| 54 | 21.582 | 3,6,6-TRIMETHYL-CYCLOHEX-2-ENONE | C9H14O | 23438-77-9 | 138.104 |
| 55 | 21.709 | Terpinen-4-ol | C10H18O | 562-74-3 | 154.136 |
| 56 | 22.006 | p-Fluoroethylbenzene | C8H9F | 459-47-2 | 124.069 |
| 57 | 22.144 | Propanoic acid, 2-methyl-, 2-ethyl-3-hydroxyhexyl ester | C12H24O3 | 74367-31-0 | 216.173 |
| 58 | 22.326 | Cyclohexanol, 5-methyl-2-(1-methylethyl)- | C10H20O | 1490-04-6 | 156.151 |
| 59 | 22.453 | 1-Octadecanol, TMS derivative | C21H46OSi | 18748-98-6 | 342.332 |
| 60 | 22.634 | Acetophenone | C8H8O | 98-86-2 | 120.058 |
| 61 | 22.7 | 2-Propanol, 1-(2-butoxy-1-methylethoxy)- | C10H22O3 | 29911-28-2 | 190.157 |
| 62 | 22.772 | trans-Verbenyl caprate | C20H34O2 | 1000414-14-7 | 306.256 |
| 63 | 22.871 | 2-Propanol, 1-(2-butoxy-1-methylethoxy)- | C10H22O3 | 29911-28-2 | 190.157 |
| 64 | 22.926 | 2,2'-Bioxepane | C12H22O2 | 74793-02-5 | 198.162 |
| 65 | 22.992 | Cyclohexanol, 1-methyl-4-(1-methylethenyl)- | C10H18O | 138-87-4 | 154.136 |
| 66 | 23.097 | 2-Isopropenyl-5-methylhex-4-enal | C10H16O | 75697-98-2 | 152.12 |
| 67 | 23.24 | L-.alpha.-Terpineol | C10H18O | 10482-56-1 | 154.136 |
| 68 | 23.339 | Bicyclo[2.2.1]heptan-2-ol, 1,7,7-trimethyl-, (1S-endo)- | C10H18O | 464-45-9 | 154.136 |
| 69 | 23.461 | 5-Methylfurfuryl acetate | C8H10O3 | 18091-24-2 | 154.063 |
| 70 | 23.593 | Methyl 6-methyloctanoate | C10H20O2 | 5129-62-4 | 172.146 |
| 71 | 23.775 | 4-Thujen-2-.alpha.-yl acetate | C12H18O2 | 95875-05-1 | 194.131 |
| 72 | 23.89 | 2,2,6,7-Tetramethyl-10-oxatricyclo[4.3.0.1(1,7)]decan-5-one | C13H20O2 | 121747-63-5 | 208.146 |
| 73 | 24.023 | Cyclohexanol, 2-methyl-5-(1-methylethenyl)- | C10H18O | 619-01-2 | 154.136 |
| 74 | 24.16 | Benzenemethanol, .alpha.,.alpha.-dimethyl- | C9H12O | 617-94-7 | 136.089 |
| 75 | 24.221 | Aniline | C6H7N | 62-53-3 | 93.058 |
| 76 | 24.303 | 8-Oxononanoic acid | C9H16O3 | 25542-64-7 | 172.11 |
| 77 | 24.469 | Ethanone, 1-(2-methylphenyl)- | C9H10O | 577-16-2 | 134.073 |
| 78 | 24.788 | Cyclohexanol, 2-methyl-5-(1-methylethenyl)- | C10H18O | 619-01-2 | 154.136 |
| 79 | 24.898 | Benzenemethanol, .alpha.-methyl- | C8H10O | 98-85-1 | 122.073 |
| 80 | 24.998 | Benzaldehyde, 3,4-dimethyl- | C9H10O | 5973-71-7 | 134.073 |
| 81 | 25.113 | Anethole, trans- | C10H12O | 4180-23-8 | 148.089 |
| 82 | 25.262 | N,2,3-Trimethyl-2-isopropylbutanamide | C10H21NO | 51115-67-4 | 171.162 |
| 83 | 25.334 | 2-Hepten-3-ol, 4,5-dimethyl- | C9H18O | 55956-37-1 | 142.136 |
| 84 | 25.427 | Octan-2-one, 3,6-dimethyl- | C10H20O | 118452-32-7 | 156.151 |
| 85 | 25.526 | Propanoic acid, 2-methyl-, 3-hydroxy-2,2,4-trimethylpentyl ester | C12H24O3 | 77-68-9 | 216.173 |
| 86 | 25.604 | 7,8-Epoxy-.alpha.-ionone | C13H20O2 | 37079-64-4 | 208.146 |
| 87 | 25.686 | 2,2,2-Trichloro-1-phenylethanol | C8H7Cl3O | 2000-43-3 | 223.956 |
| 88 | 25.763 | 2,2,4-Trimethyl-1,3-pentanediol diisobutyrate | C16H30O4 | 6846-50-0 | 286.214 |
| 89 | 25.951 | 3-Hydroxy-2,6,6-trimethyl-cyclohexene-1-carboxylic acid | C10H16O3 | 141040-72-4 | 184.11 |
| 90 | 26.072 | Butylated Hydroxytoluene | C15H24O | 128-37-0 | 220.183 |
| 91 | 26.435 | 4H-Chromene, 4a,5,6,7,8,8a-hexahydro-2,3,5,5,8a-pentamethyl | C14H24O | 1000196-77-4 | 208.183 |
| 92 | 26.523 | Phenol, 2-chloro-6-methyl- | C7H7ClO | 87-64-9 | 142.019 |
| 93 | 26.777 | 4-Hydroxy-.beta.-ionone | C13H20O2 | 116296-75-4 | 208.146 |
| 94 | 26.837 | Quinoline, 2-methyl- | C10H9N | 91-63-4 | 143.073 |
| 95 | 26.926 | 8-Hydroxytricyclo(5.2.1.02,6)-4-decene | C10H14O | 133-21-1 | 150.104 |
| 96 | 27.047 | 3(2H)-Furanone, 2-hexyl-5-methyl- | C11H18O2 | 33922-66-6 | 182.131 |
| 97 | 27.162 | Phenol, 2-methyl- | C7H8O | 95-48-7 | 108.058 |
| 98 | 27.229 | Phenol | C6H6O | 108-95-2 | 94.042 |
| 99 | 27.471 | 2-Isopropyl-5-methyl-6-oxabicyclo[3.1.0]hexane-1-carboxaldehyde | C10H16O2 | 1000186-21-3 | 168.115 |
| 100 | 27.62 | Thiophene, 2-ethyl-5-heptyl- | C13H22S | 5206-09-7 | 210.144 |
| 101 | 27.708 | 2,4-Dihydroxybenzoic acid, 3TMS derivative | C16H30O4Si3 | 10586-16-0 | 370.145 |
| 102 | 27.846 | Phenol, 2-ethyl- | C8H10O | 90-00-6 | 122.073 |
| 103 | 28.005 | Phenol, 3-methyl- | C7H8O | 108-39-4 | 108.058 |
| 104 | 28.925 | Phenol, 4-ethyl- | C8H10O | 123-07-9 | 122.073 |
| 105 | 29.002 | Phenol, 3-ethyl- | C8H10O | 620-17-7 | 122.073 |
| 106 | 29.14 | 7-Benzofuranol, 2,3-dihydro-2,2-dimethyl- | C10H12O2 | 1563-38-8 | 164.084 |
| 107 | 29.25 | Phenol, 5-methyl-2-(1-methylethyl)-, acetate | C12H16O2 | 528-79-0 | 192.115 |
| 108 | 29.349 | Phenol, 2-(1-methylethyl)- | C9H12O | 88-69-7 | 136.089 |
| 109 | 29.46 | Ethanone, 1-(2-aminophenyl)- | C8H9NO | 551-93-9 | 135.068 |
| 110 | 29.807 | Phenol, 3-propyl- | C9H12O | 621-27-2 | 136.089 |
| 111 | 30.021 | 5-Isopropyl-2-methylphenyl carbanilate | C17H19NO2 | 1155-45-9 | 269.142 |
| 112 | 30.104 | 2,4-Di-tert-butylphenol | C14H22O | 96-76-4 | 206.167 |
| 113 | 30.22 | 5-(Homoveratrylamino)-3H-1,3,4-thiadiazole-2-thione, N-methyl- | C11H14N2S | 1000504-86-9 | 206.088 |
| 114 | 30.495 | 2,6,10-Dodecatrien-1-ol, 12-acetoxy-2,6,10-trimethyl-, (E,E,E)- | C17H28O3 | 93787-91-8 | 280.204 |
| 115 | 30.699 | Isoaromadendrene epoxide | C15H24O | 1000159-36-6 | 220.183 |
| 116 | 30.903 | Benzenamine, 2-bromo- | C6H6BrN | 615-36-1 | 170.968 |
| 117 | 31.47 | Hexahydro-3-butylphthalide | C12H20O2 | 3553-34-2 | 196.146 |
| 118 | 31.624 | Phenol, 4-chloro-2-methyl- | C7H7ClO | 1570-64-5 | 142.019 |
| 119 | 31.85 | Phenol, 3-chloro- | C6H5ClO | 108-43-0 | 128.003 |
| 120 | 32.016 | Indole | C8H7N | 120-72-9 | 117.058 |
| 121 | 32.627 | 1H-Indole, 2-methyl- | C9H9N | 95-20-5 | 131.073 |
| 122 | 35.794 | Spiro[4.5]decane-6,10-dione, 8-(4-dimethylaminophenyl)-9,9-dimethyl-7-oxa- | C19H25NO3 | 1000302-66-7 | 315.183 |

**Table S12** Organic matter of effluent in R1 at stage Ⅷ.

| Number | Retention time(min) | Compound name | Molecular formula | CAS | Molecular weight |
| --- | --- | --- | --- | --- | --- |
| 1 | 0.099 | cis-Aconitic anhydride | C6H4O5 | 6318-55-4 | 156.006 |
| 2 | 1.052 | Acetone | C3H6O | 67-64-1 | 58.042 |
| 3 | 2.203 | Ethyl Acetate | C4H8O2 | 141-78-6 | 88.052 |
| 4 | 2.451 | 2-Butanone | C4H8O | 78-93-3 | 72.058 |
| 5 | 3.63 | 1-Propanol, 2-amino-, (.+/-.)- | C3H9NO | 6168-72-5 | 75.068 |
| 6 | 4.351 | 3-Heptanone, 5-ethyl-4-methyl- | C10H20O | 27607-63-2 | 156.151 |
| 7 | 5.773 | 2-Butanol, (R)- | C4H10O | 14898-79-4 | 74.073 |
| 8 | 5.85 | Silanol, trimethyl- | C3H10OSi | 1066-40-6 | 90.05 |
| 9 | 6.087 | Cyclohexane, 1,2,3-trimethyl- | C9H18 | 1678-97-3 | 126.141 |
| 10 | 10.73 | Pyridine | C5H5N | 110-86-1 | 79.042 |
| 11 | 11.292 | Dodecane | C12H26 | 112-40-3 | 170.203 |
| 12 | 11.661 | Thioglycolic acid, tert-butyldimethylsilyl ester | C8H18O2SSi | 1000476-01-2 | 206.08 |
| 13 | 11.777 | Aniline | C6H7N | 62-53-3 | 93.058 |
| 14 | 12.813 | Sulfur dioxide | O2S | 7446-09-5 | 63.962 |
| 15 | 13.931 | Methylal | C3H8O2 | 109-87-5 | 76.052 |
| 16 | 14.157 | Cyclohexanone | C6H10O | 108-94-1 | 98.073 |
| 17 | 14.35 | Tridecane | C13H28 | 629-50-5 | 184.219 |
| 18 | 15.336 | Pyridine, 2,5-dimethyl- | C7H9N | 589-93-5 | 107.073 |
| 19 | 15.446 | Arsenous acid, tris(trimethylsilyl) ester | C9H27AsO3Si3 | 55429-29-3 | 342.048 |
| 20 | 15.964 | Benzenemethanamine, N,N-dimethyl- | C9H13N | 103-83-3 | 135.105 |
| 21 | 16.234 | Pyridine, 2,4,6-trimethyl- | C8H11N | 108-75-8 | 121.089 |
| 22 | 16.498 | Ethanol, 2-[2-(2-ethoxyethoxy)ethoxy]- | C8H18O4 | 112-50-5 | 178.121 |
| 23 | 16.597 | Cyclohexanone, 3,3,5-trimethyl- | C9H16O | 873-94-9 | 140.12 |
| 24 | 16.68 | Pyridine, 4-ethyl- | C7H9N | 536-75-4 | 107.073 |
| 25 | 17.137 | 3,7-Octadiene-2,6-diol, 2,6-dimethyl- | C10H18O2 | 13741-21-4 | 170.131 |
| 26 | 17.341 | Cyclohexanol | C6H12O | 108-93-0 | 100.089 |
| 27 | 17.941 | 3-Heptyne-2,6-dione, 5-methyl-5-(1-methylethyl)- | C11H16O2 | 63922-44-1 | 180.115 |
| 28 | 18.244 | p-Cymene | C10H14 | 99-87-6 | 134.11 |
| 29 | 18.371 | trans-Linalool oxide (furanoid) | C10H18O2 | 34995-77-2 | 170.131 |
| 30 | 18.707 | 1,2,4-Triazol-3-amine, 5-(1,3,5-trimethyl-4-pyrazolyl)amino- | C8H13N7 | 1000264-16-7 | 207.123 |
| 31 | 18.79 | Angolensin, 2TMS derivative | C22H32O4Si2 | 1000488-62-3 | 416.184 |
| 32 | 19.076 | trans-Linalool oxide (furanoid) | C10H18O2 | 34995-77-2 | 170.131 |
| 33 | 19.484 | 1-Hexanol, 2-ethyl- | C8H18O | 104-76-7 | 130.136 |
| 34 | 19.55 | Benzene, 1,2,4,5-tetramethyl- | C10H14 | 95-93-2 | 134.11 |
| 35 | 19.621 | 1,8-Nonadiene, 2,7-dimethyl-5-(1-methylethenyl)- | C14H24 | 68702-20-5 | 192.188 |
| 36 | 19.693 | 2-Cyclopenten-1-one, 2,3,4-trimethyl- | C8H12O | 28790-86-5 | 124.089 |
| 37 | 19.875 | 3-Hydroxy-4-methoxybenzaldehyde, TBDMS | C14H22O3Si | 1000461-64-9 | 266.134 |
| 38 | 19.963 | 4-Penten-1-one, 1-(1H-imidazol-4-yl)- | C8H10N2O | 69393-39-1 | 150.079 |
| 39 | 20.128 | (+)-2-Bornanone | C10H16O | 464-49-3 | 152.12 |
| 40 | 20.194 | 2,5-Dihydroxybenzaldehyde, 2TMS derivative | C13H22O3Si2 | 56114-69-3 | 282.111 |
| 41 | 20.387 | Benzaldehyde | C7H6O | 100-52-7 | 106.042 |
| 42 | 20.618 | Cyclohexanol, 3,3,5-trimethyl- | C9H18O | 116-02-9 | 142.136 |
| 43 | 20.707 | Eucalyptol | C10H18O | 470-82-6 | 154.136 |
| 44 | 20.894 | Cyclohexene, 4-methyl-1-(1-methylethyl)- | C10H18 | 500-00-5 | 138.141 |
| 45 | 21.004 | 4-Amino-2-methoxy-5-nitrobenzoic acid, N-trimethylsilyl-, trimethylsilyl ester | C14H24N2O5Si2 | 1000501-32-8 | 356.122 |
| 46 | 21.147 | 4-Amino-2-methoxy-5-nitrobenzoic acid, N-trimethylsilyl-, trimethylsilyl ester | C14H24N2O5Si2 | 1000501-32-8 | 356.122 |
| 47 | 21.246 | Cyclohexanol, 2-(1-methylethyl)- | C9H18O | 96-07-1 | 142.136 |
| 48 | 21.384 | 5-Amino-1-methyl-1H-pyrazole-4-carboxamide, 3TMS | C14H32N4OSi3 | 1000509-52-4 | 356.188 |
| 49 | 21.461 | Rose oxide,trans-dihydro- | C10H20O | 140238-79-5 | 156.151 |
| 50 | 21.632 | Isophorone | C9H14O | 78-59-1 | 138.104 |
| 51 | 21.753 | Terpinen-4-ol | C10H18O | 562-74-3 | 154.136 |
| 52 | 21.957 | 1H-Indene, octahydro-, trans- | C9H16 | 3296-50-2 | 124.125 |
| 53 | 22.04 | p-Fluoroethylbenzene | C8H9F | 459-47-2 | 124.069 |
| 54 | 22.177 | Propanoic acid, 2-methyl-, 2-ethyl-3-hydroxyhexyl ester | C12H24O3 | 74367-31-0 | 216.173 |
| 55 | 22.348 | Cyclohexanol, 5-methyl-2-(1-methylethyl)- | C10H20O | 1490-04-6 | 156.151 |
| 56 | 22.662 | Acetophenone | C8H8O | 98-86-2 | 120.058 |
| 57 | 22.728 | 2-Propanol, 1-(2-butoxy-1-methylethoxy)- | C10H22O3 | 29911-28-2 | 190.157 |
| 58 | 22.894 | 2-Propanol, 1-(2-butoxy-1-methylethoxy)- | C10H22O3 | 29911-28-2 | 190.157 |
| 59 | 22.954 | 1,1'-Bicyclohexyl-1,1'-diol | C12H22O2 | 2888-11-1 | 198.162 |
| 60 | 23.263 | .alpha.-Terpineol | C10H18O | 98-55-5 | 154.136 |
| 61 | 23.356 | endo-Borneol | C10H18O | 507-70-0 | 154.136 |
| 62 | 23.477 | Acetic acid, 2-acetoxymethylcyclohexyl ester | C11H18O4 | 833-72-7 | 214.121 |
| 63 | 23.604 | Butanoic acid, 2-methyl- | C5H10O2 | 116-53-0 | 102.068 |
| 64 | 23.764 | 2-Nitro-1-phenyl-1-propanol | C9H11NO3 | 6343-57-3 | 181.074 |
| 65 | 23.907 | 4,11-Dimethyl-8-(propan-2-yl)-5,12-dioxatricyclo[9.1.0.04,6]dodecan-7-ol, Me | C16H28O3 | 1010493-61-7 | 268.204 |
| 66 | 24.034 | Cyclohexanol, 2-methyl-5-(1-methylethenyl)- | C10H18O | 619-01-2 | 154.136 |
| 67 | 24.172 | Benzenemethanol, .alpha.,.alpha.-dimethyl- | C9H12O | 617-94-7 | 136.089 |
| 68 | 24.232 | Aniline | C6H7N | 62-53-3 | 93.058 |
| 69 | 24.315 | 8-Oxononanoic acid | C9H16O3 | 25542-64-7 | 172.11 |
| 70 | 24.486 | (+)-cis-Verbenol, 2-methylpropionate | C14H22O2 | 1000462-96-7 | 222.162 |
| 71 | 24.8 | Fragranyl isovaalerate | C15H26O2 | 51193-03-4 | 238.193 |
| 72 | 24.904 | Benzenemethanol, .alpha.-methyl- | C8H10O | 98-85-1 | 122.073 |
| 73 | 25.009 | Benzaldehyde, 3,4-dimethyl- | C9H10O | 5973-71-7 | 134.073 |
| 74 | 25.125 | Anethole | C10H12O | 104-46-1 | 148.089 |
| 75 | 25.268 | N,2,3-Trimethyl-2-isopropylbutanamide | C10H21NO | 51115-67-4 | 171.162 |
| 76 | 25.334 | Butanoic acid, tridec-2-ynyl ester | C17H30O2 | 1010299-12-6 | 266.225 |
| 77 | 25.428 | 3-Pentanol, 1-chloro-3-methyl- | C6H13ClO | 33879-66-2 | 136.065 |
| 78 | 25.532 | Propanoic acid, 2-methyl-, 3-hydroxy-2,2,4-trimethylpentyl ester | C12H24O3 | 77-68-9 | 216.173 |
| 79 | 25.697 | 2,2,2-Trichloro-1-phenylethanol | C8H7Cl3O | 2000-43-3 | 223.956 |
| 80 | 25.769 | 2,2,4-Trimethyl-1,3-pentanediol diisobutyrate | C16H30O4 | 6846-50-0 | 286.214 |
| 81 | 25.951 | Cyclohexane-1-methanol, 3,3-dimethyl-2-(3-methyl-1,3-butadienyl)- | C14H24O | 1000196-01-5 | 208.183 |
| 82 | 26.072 | Butylated Hydroxytoluene | C15H24O | 128-37-0 | 220.183 |
| 83 | 26.441 | 4H-Chromene, 4a,5,6,7,8,8a-hexahydro-2,3,5,5,8a-pentamethyl | C14H24O | 1000196-77-4 | 208.183 |
| 84 | 26.491 | 2-Ethoxy-4-methylphenol | C9H12O2 | 2563-07-7 | 152.084 |
| 85 | 26.535 | 1-butyne, 4-chloro-3-methyl-3-phenyl- | C11H11Cl | 1000161-45-9 | 178.055 |
| 86 | 26.783 | 4-Hydroxy-.beta.-ionone | C13H20O2 | 116296-75-4 | 208.146 |
| 87 | 26.849 | 2,4-Bis(hydroxylamino)pyrimidine | C4H6N4O2 | 154845-38-2 | 142.049 |
| 88 | 26.931 | 8-Hydroxytricyclo(5.2.1.02,6)-4-decene | C10H14O | 133-21-1 | 150.104 |
| 89 | 27.168 | Phenol, 2-methyl- | C7H8O | 95-48-7 | 108.058 |
| 90 | 27.229 | Phenol | C6H6O | 108-95-2 | 94.042 |
| 91 | 27.482 | Thiophene, 2-ethyl-5-heptyl- | C13H22S | 5206-09-7 | 210.144 |
| 92 | 27.625 | Thiophene, 2-ethyl-5-heptyl- | C13H22S | 5206-09-7 | 210.144 |
| 93 | 27.851 | Phenol, 2-ethyl- | C8H10O | 90-00-6 | 122.073 |
| 94 | 28.007 | Phenol, 3-methyl- | C7H8O | 108-39-4 | 108.058 |
| 95 | 28.088 | Phenol, 3-methyl- | C7H8O | 108-39-4 | 108.058 |
| 96 | 28.182 | Quinazoline, 4-methyl- | C9H8N2 | 700-46-9 | 144.069 |
| 97 | 28.309 | Imidazole, 1,4-dimethyl-2-phenyl- | C11H12N2 | 1000129-12-9 | 172.1 |
| 98 | 28.584 | Cyclohexanecarboxylic acid | C7H12O2 | 98-89-5 | 128.084 |
| 99 | 28.656 | 4-(3-Methoxyphenyl)propylcyanide | C11H13NO | 91152-85-1 | 175.1 |
| 100 | 28.777 | 3-Allyloxy-6-(4-methoxy-benzyloxy)-cyclohexane-4,5-diol- [1,2-(1,1-cyclohexyldiether)] | C23H32O7 | 1010362-92-4 | 420.215 |
| 101 | 28.925 | Phenol, 4-ethyl- | C8H10O | 123-07-9 | 122.073 |
| 102 | 29.003 | Phenol, 3-ethyl- | C8H10O | 620-17-7 | 122.073 |
| 103 | 29.14 | 7-Benzofuranol, 2,3-dihydro-2,2-dimethyl- | C10H12O2 | 1563-38-8 | 164.084 |
| 104 | 29.245 | Phenol, 2-methyl-5-(1-methylethyl)- | C10H14O | 499-75-2 | 150.104 |
| 105 | 29.35 | Phenol, 2-(1-methylethyl)- | C9H12O | 88-69-7 | 136.089 |
| 106 | 29.46 | Ethanone, 1-(2-aminophenyl)- | C8H9NO | 551-93-9 | 135.068 |
| 107 | 29.807 | Phenol, 3-propyl- | C9H12O | 621-27-2 | 136.089 |
| 108 | 30.022 | 5-Isopropyl-2-methylphenyl carbanilate | C17H19NO2 | 1155-45-9 | 269.142 |
| 109 | 30.099 | Phenol, 2,5-bis(1,1-dimethylethyl)- | C14H22O | 5875-45-6 | 206.167 |
| 110 | 30.226 | 3-(Hydroxy-phenyl-methyl)-1-methyl-4-phenyl-piperidin-4-ol | C19H23NO2 | 1000297-16-0 | 297.173 |
| 111 | 30.501 | 1-(2-Hydroxy-5-methylphenyl)propan-1-one, TMS | C13H20O2Si | 1000506-71-9 | 236.123 |
| 112 | 30.694 | (3aR,6R,8aR)-7,7-Dimethyl-8-methylenehexahydro-1H-3a,6-methanoazulen-3(2H)-one | C14H20O | 30557-76-7 | 204.151 |
| 113 | 30.909 | Benzenesulfonyl chloride, 4-methoxy- | C7H7ClO3S | 98-68-0 | 205.98 |
| 114 | 31.47 | 7-Oxo-2-oxa-7-thiatricyclo[4.4.0.0(3,8)]decan-4-ol | C8H12O3S | 1000186-78-4 | 188.051 |
| 115 | 31.619 | Phenol, 4-chloro-2-methyl- | C7H7ClO | 1570-64-5 | 142.019 |
| 116 | 31.845 | Phenol, 4-chloro- | C6H5ClO | 106-48-9 | 128.003 |
| 117 | 32.016 | Indole | C8H7N | 120-72-9 | 117.058 |
| 118 | 32.627 | 1H-Indole, 2-methyl- | C9H9N | 95-20-5 | 131.073 |
| 119 | 33.145 | Succinamic acid, N-isochroman-1-ylmethyl- | C14H17NO4 | 1000305-79-5 | 263.116 |
| 120 | 33.69 | 1H-Cyclopropa[a]naphthalene, 1a,2,6,7,7a,7b-hexahydro-1,1,7,7a-tetramethyl-, [1aR-(1a.alpha.,7.alpha.,7a.alpha.,7b.alpha.)]- | C15H22 | 34143-96-9 | 202.172 |
| 121 | 35.795 | Pyridine-3-carbonitrile, 1-(2-hydroxypropyl)-4,6-dimethyl-2-oxo-1,2-dihydro- | C11H14N2O2 | 1000302-90-3 | 206.106 |
| 122 | 36.957 | Tetradecanoic acid | C14H28O2 | 544-63-8 | 228.209 |

**Table S13** Summary table of chemical compounds.

| Compound category | Influent | Effluent at stage Ⅵ | Effluent at stage Ⅶ | Effluent at stage Ⅷ |
| --- | --- | --- | --- | --- |
| Hydrocarbons | 2 | 5 | 4 | 10 |
| Alcohols | 26 | 17 | 22 | 19 |
| Phenols | 13 | 12 | 13 | 15 |
| Ketones | 16 | 25 | 21 | 13 |
| Aldehydes | 3 | 5 | 4 | 3 |
| Ethers | 9 | 6 | 7 | 4 |
| Carboxylic acids | 3 | 5 | 4 | 5 |
| Esters | 11 | 14 | 12 | 10 |
| Amides | 3 | 2 | 2 | 2 |
| Amines | 1 | 2 | 3 | 3 |
| Oxygen-containing heterocyclic compounds | 6 | 14 | 10 | 8 |
| Nitrogen-containing heterocyclic compounds | 4 | 10 | 12 | 14 |
| Sulfur-containing heterocyclic compounds | 2 | 2 | 1 | 2 |
| Silicon-containing compounds | 1 | 5 | 4 | 10 |
| Others | 1 | 2 | 3 | 4 |
| Total | 101 | 126 | 122 | 122 |

**Table S14** Alpha diversity index results.

|  | Sobs | Ace | Chao | Shannon | Simpson | Coverage |
| --- | --- | --- | --- | --- | --- | --- |
| Stage Ⅵ | 16101 | 16101 | 16101 | 5.507621 | 0.030013 | 1 |
| Stage Ⅶ | 16516 | 16516 | 16516 | 5.864957 | 0.019478 | 1 |
| Stage Ⅷ | 16923 | 16923 | 16923 | 5.847598 | 0.021439 | 1 |

**Table S15** Protein expression of key enzymes.

|  |  | Stage Ⅵ | Stage Ⅶ | Stage Ⅷ |
| --- | --- | --- | --- | --- |
| Acetate oxidation | ackA | 46821.38 | 43680.99 | 54609.29 |
| pta | 468.49 | 372.47 | 290.39 |
| folD | 439.05 | 1432.40 | 3407.07 |
| ths | 1616.35 | 2378.11 | 2937.87 |
| fdhA | 6294.70 | 5102.09 | 5677.42 |
| porA | 15756.35 | 9861.10 | 21912.96 |
| glyA | 9076.53 | 8202.09 | 11470.74 |
| GLDC | 1079.53 | 1102.32 | 982.81 |
| cooS | 1071.95 | 1141.70 | 2585.05 |
| ACSS1_2 | 1216.53 | 998.35 | 794.00 |
| Propionate oxidation | ackA | 46821.38 | 43680.99 | 54609.29 |
| pta | 468.49 | 372.47 | 290.39 |
| MECC | 5721.20 | 6077.79 | 5303.60 |
| MUT | 6788.71 | 11586.47 | 8532.66 |
| sucD | 3964.67 | 5383.56 | 5061.85 |
| fumA | 7526.08 | 10205.41 | 7261.17 |
| mdh | 22921.08 | 21963.80 | 28311.83 |
| oadA | 1109.48 | 1428.97 | 1632.15 |
| maeA | 1743.81 | 1807.13 | 1482.92 |
| porA | 15756.35 | 9861.10 | 21912.96 |
| korA | 21884.77 | 23826.31 | 29238.50 |
| aarC | 6220.41 | 8622.27 | 8802.85 |
| ACSS1_2 | 1216.53 | 998.35 | 794.00 |
| Butyrate oxidation | paaF | 186.32 | 216.73 | 137.72 |
| paaH | 78135.67 | 55708.56 | 133733.54 |
| ACADS | 11113.57 | 10527.10 | 9292.45 |
| ACAT | 196457.05 | 112923.56 | 114844.88 |
| ackA | 46821.38 | 43680.99 | 54609.29 |
| pta | 468.49 | 372.47 | 290.39 |
| aarC | 6220.41 | 8622.27 | 8802.85 |
| HADH | 1951.49 | 1895.31 | 1184.42 |
| ACSS1_2 | 1216.53 | 998.35 | 794.00 |
| Valerate oxidation | ACAT | 196457.05 | 112923.56 | 114844.88 |
| pta | 468.49 | 372.47 | 290.39 |
| ackA | 46821.38 | 43680.99 | 54609.29 |
| aarC | 6220.41 | 8622.27 | 8802.85 |
| IVD | 1109.41 | 524.98 | 559.75 |
| ACSS1_2 | 1216.53 | 998.35 | 794.00 |

**Table S16** Differential protein expression of key enzymes.

|  |  | Stage Ⅵ | Stage Ⅶ | Stage Ⅷ |
| --- | --- | --- | --- | --- |
| Acetate oxidation | ackA | -3140.39 | 10928.31 | 7787.91 |
| pta | -96.02 | -82.07 | -178.09 |
| folD | 993.34 | 1974.68 | 2968.02 |
| ths | 761.76 | 559.76 | 1321.52 |
| fdhA | -1192.60 | 575.33 | -617.27 |
| porA | -5895.24 | 12051.85 | 6156.61 |
| glyA | -874.44 | 3268.66 | 2394.21 |
| GLDC | 22.79 | -119.51 | -96.72 |
| cooS | 69.75 | 1443.35 | 1513.11 |
| ACSS1_2 | -218.19 | -204.35 | -422.53 |
| Total | -9569.24 | 30396.01 | 20826.77 |
| Propionate oxidation | ackA | -3140.39 | 10928.31 | 7787.91 |
| pta | -96.02 | -82.07 | -178.09 |
| MECC | 356.59 | -774.19 | -417.61 |
| MUT | 4797.76 | -3053.81 | 1743.95 |
| sucD | 1418.89 | -321.71 | 1097.18 |
| fumA | 2679.33 | -2944.24 | -264.91 |
| mdh | -957.28 | 6348.02 | 5390.75 |
| oadA | 319.49 | 203.18 | 522.67 |
| maeA | 63.32 | -324.21 | -260.89 |
| porA | -5895.24 | 12051.85 | 6156.61 |
| korA | 1941.54 | 5412.19 | 7353.74 |
| aarC | 2401.86 | 180.58 | 2582.44 |
| ACSS1_2 | -218.19 | -204.35 | -422.53 |
| Total | 3671.68 | 27419.55 | 31091.23 |
| Butyrate oxidation | paaF | 30.42 | -79.01 | -48.59 |
| paaH | -22427.11 | 78024.98 | 55597.87 |
| ACADS | -586.46 | -1234.65 | -1821.11 |
| ACAT | -83533.49 | 1921.31 | -81612.18 |
| ackA | -3140.39 | 10928.31 | 7787.91 |
| pta | -96.02 | -82.07 | -178.09 |
| aarC | 2401.86 | 180.58 | 2582.44 |
| HADH | -56.18 | -710.89 | -767.07 |
| ACSS1_2 | -218.19 | -204.35 | -422.53 |
| Total | -107625.56 | 88744.21 | -18881.35 |
| Valerate oxidation | ACAT | -83533.49 | 1921.31 | -81612.18 |
| pta | -96.02 | -82.07 | -178.09 |
| ackA | -3140.39 | 10928.31 | 7787.91 |
| aarC | 2401.86 | 180.58 | 2582.44 |
| IVD | -584.42 | 34.77 | -549.65 |
| ACSS1_2 | -218.19 | -204.35 | -422.53 |
| Total | -85170.65 | 12778.55 | -72392.10 |


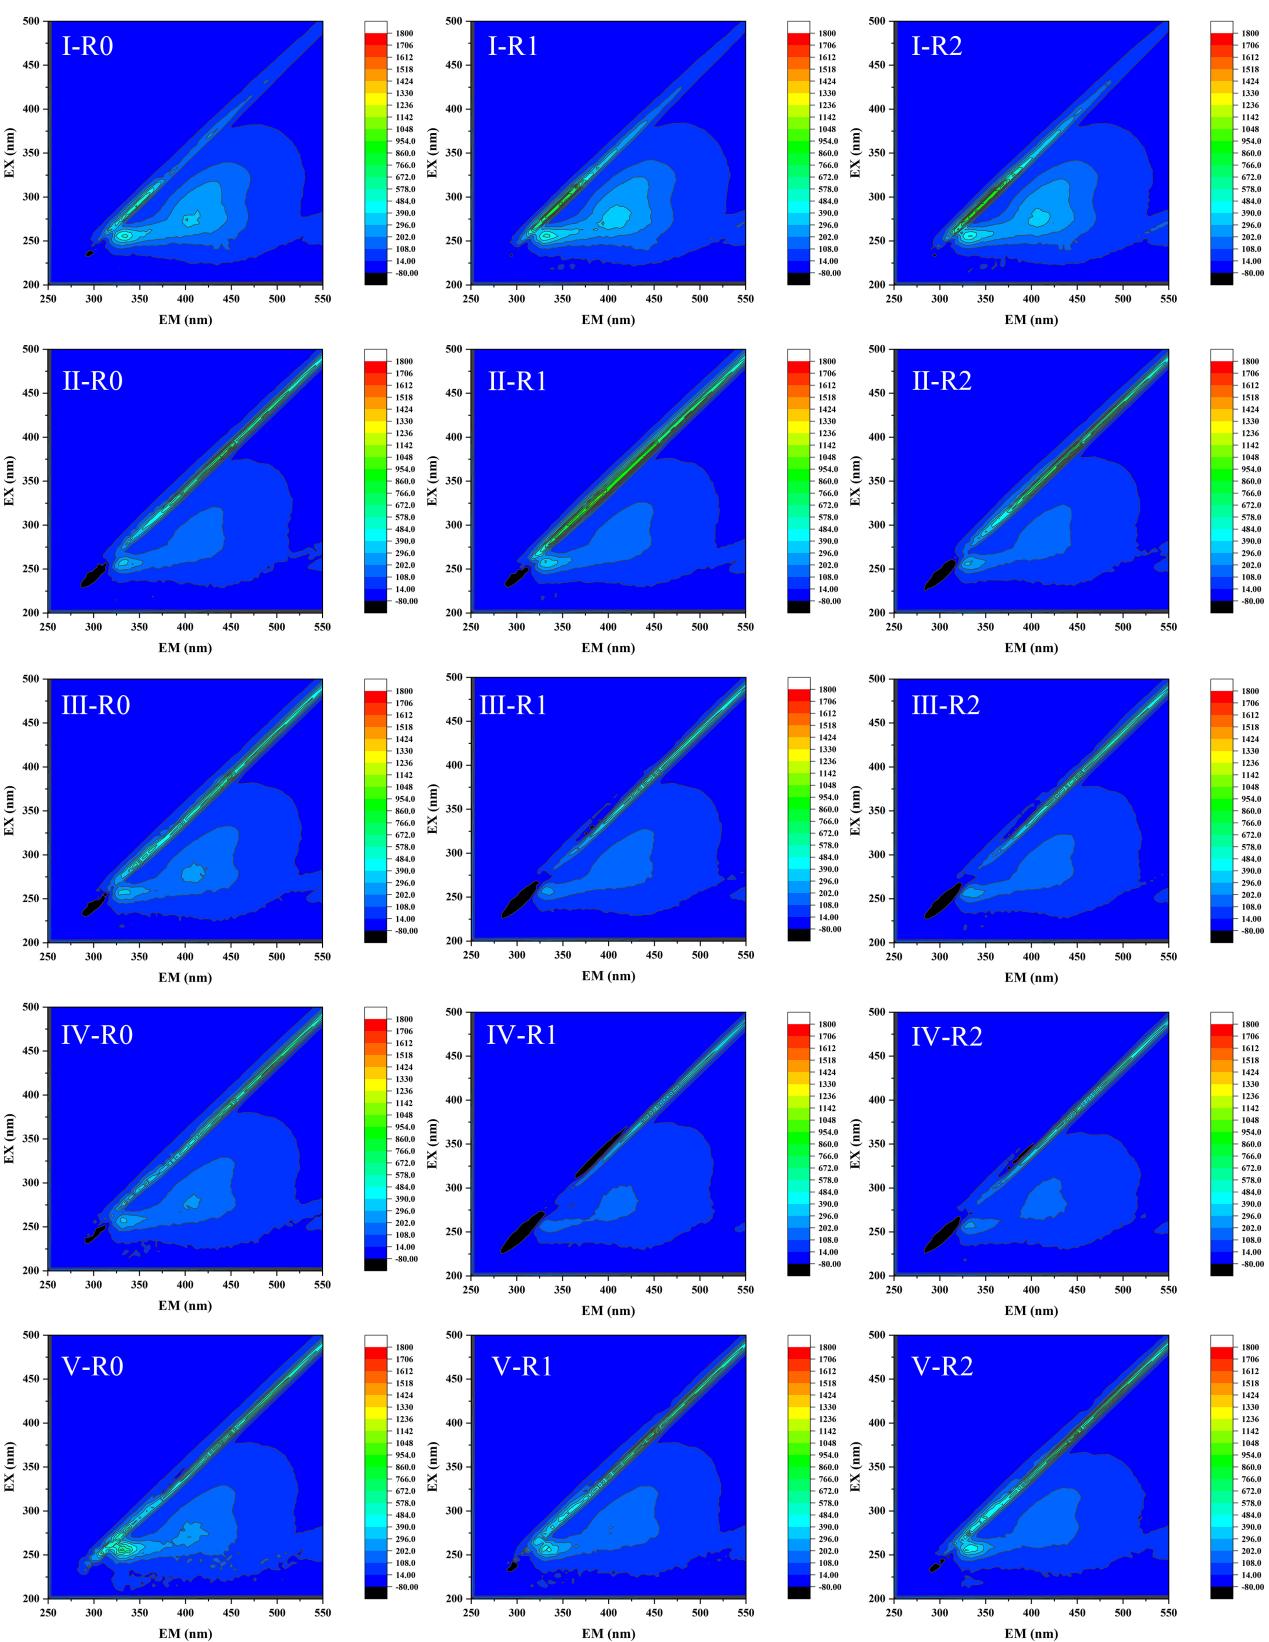


**Fig. S1.** 3D fluorescence analysis at different stages.


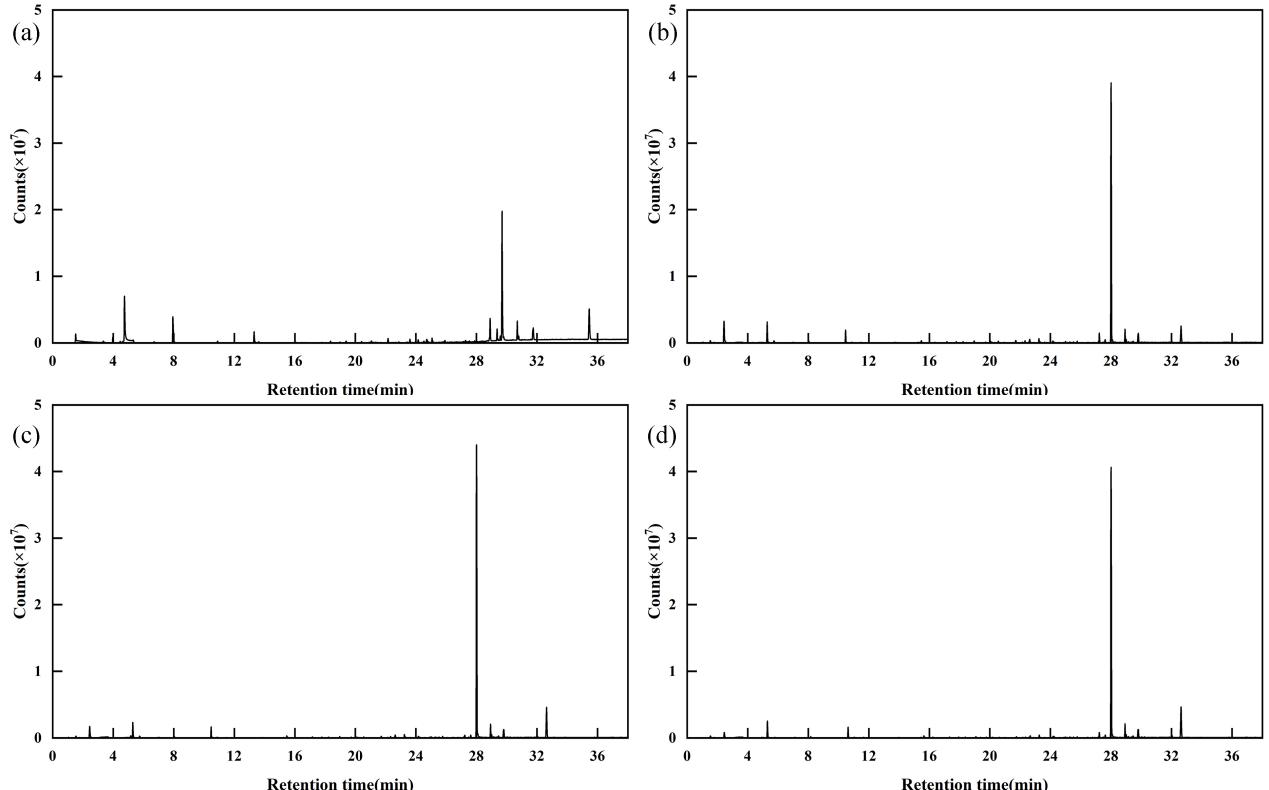
**Fig. S2.** GC-MS spectrum analysis (a: Influent; b: Effluent-stage Ⅵ; c: Effluent-stage Ⅶ; d: Effluent-stage Ⅷ).


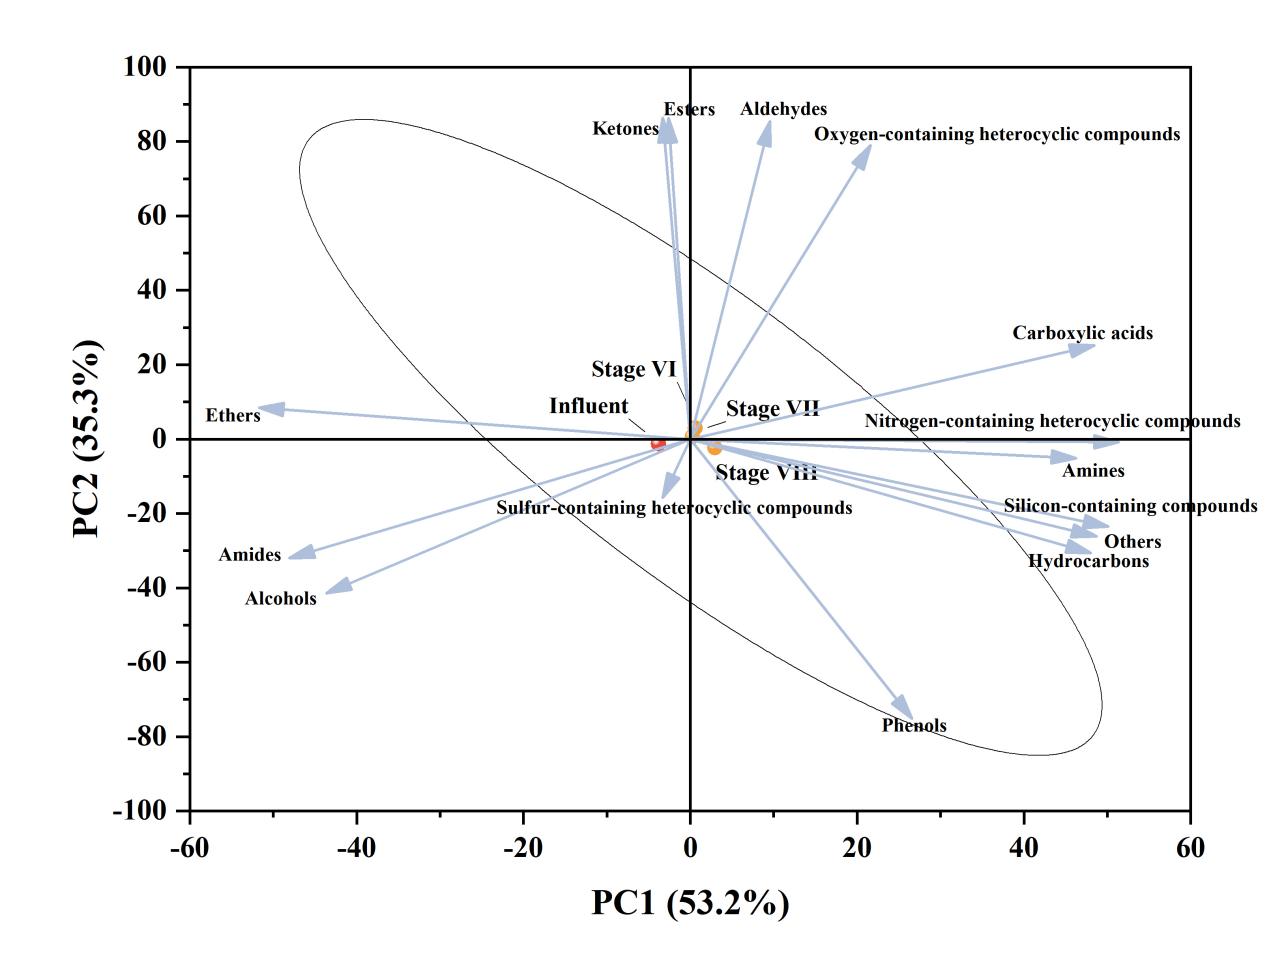
**Fig. S3.** PCA analysis of different water qualities and compound types.

**
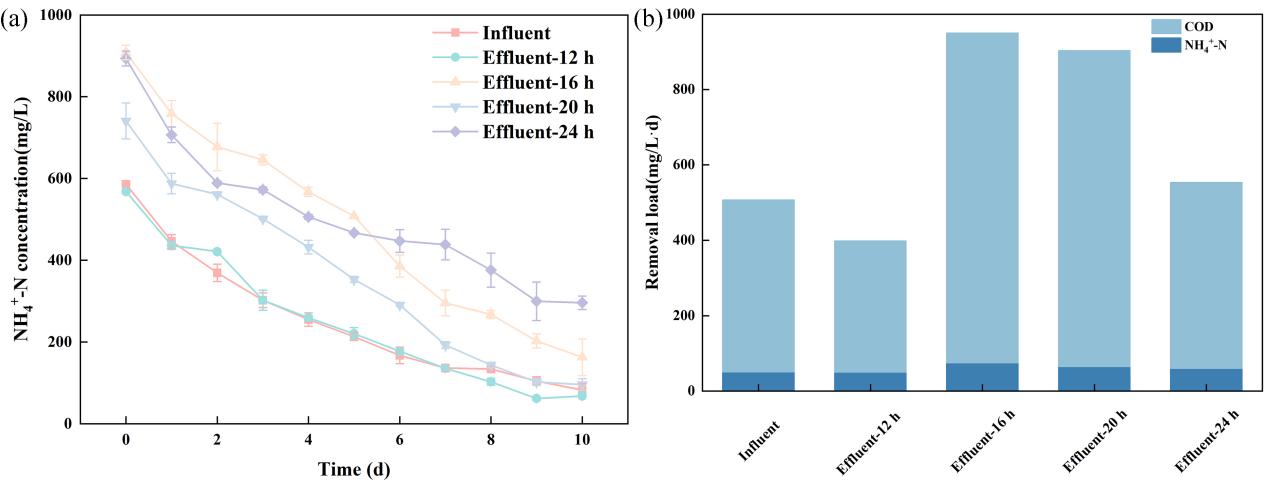
**

**Fig. S4.** Changes of NH4+-N concentration (a) and removal load of NH4+-N and COD (b) at influent and different HRTs.

**
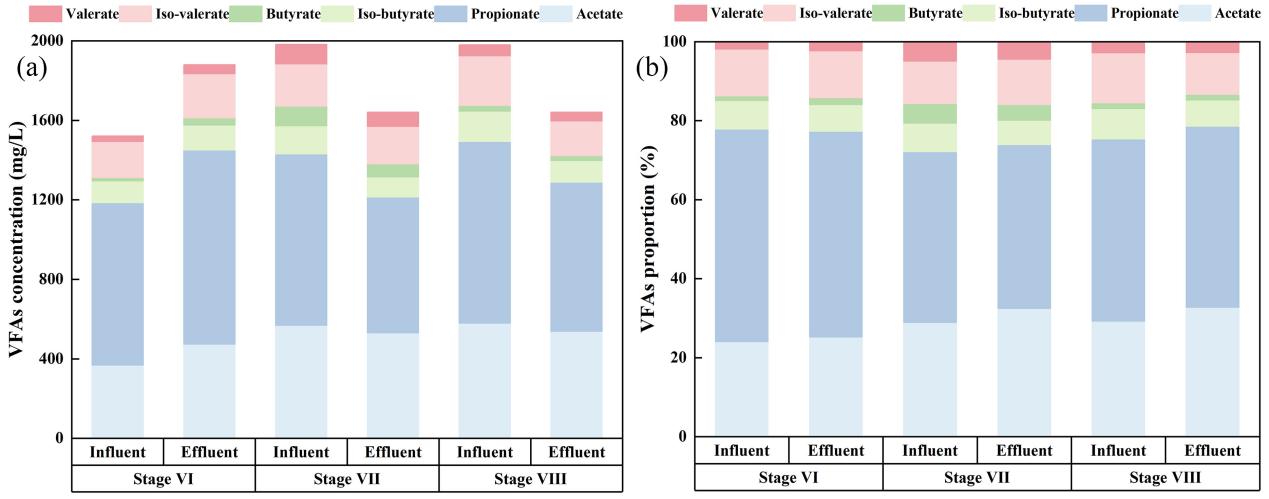
**

**Fig. S5.** Changes of VFAs concentration (a) and VFAs proportion (b) at different HRTs.

1. * Xiaochen Xu: Tel.: +86 15141189998. E-mail address: xxcep@dlut.edu.cn [↑](#footnote-ref-0)
