# Supplementary material
Source: Research Square preprint supplement (doi:10.21203/rs.3.rs-9891003/v1)

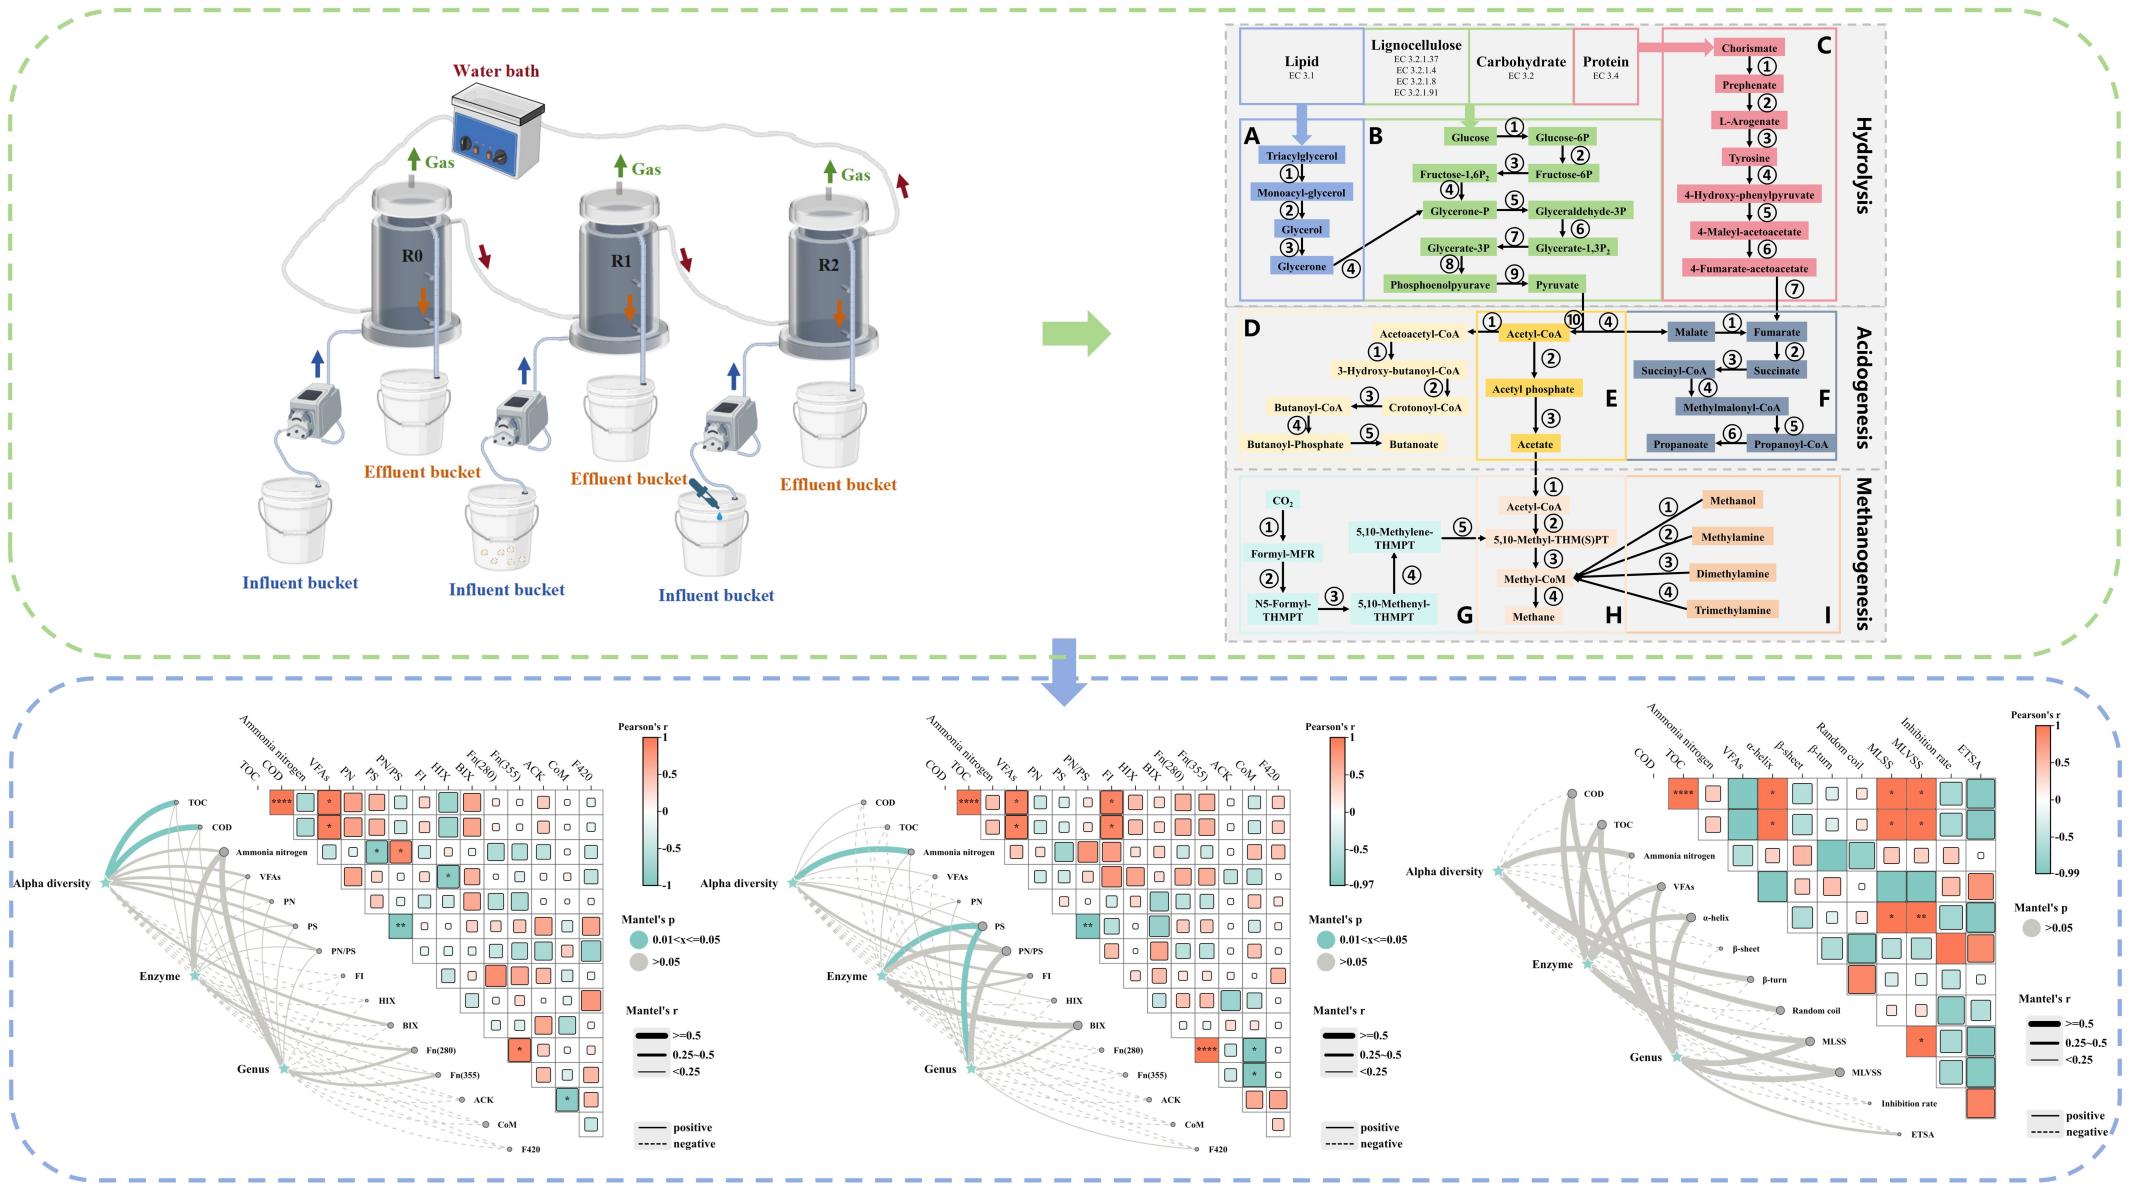

Supplement: Supplementary file 2 [file a315d4d84f373af3e0a10dc9.docx]
